# Supplementary material for: FERONIA and wall-associated kinases coordinate defense induced by lignin modification in plant cell walls
Source: PubMed Central journal article supplement — Sci Adv. 2023 Mar 10;9(10):eadf7714. doi: 10.1126/sciadv.adf7714 (PMC10005186; doi:10.1126/sciadv.adf7714), 2023-03-10
Supplement: sciadv.adf7714_sm.pdf [file sciadv.adf7714_sm.pdf]

Supplementary Materials for  
**FERONIA and wall-associated kinases coordinate defense induced by lignin  
modification in plant cell walls**

Chang Liu *et al.*

Corresponding author: Richard A. Dixon, richard.dixon@unt.edu; Chang Liu, chang.liu@nefu.edu.cn

*Sci. Adv.* **9**, eadf7714 (2023)  
DOI: 10.1126/sciadv.adf7714

**The PDF file includes:**

Figs. S1 to S10  
Tables S1 and S2  
Legend for dataset S1

**Other Supplementary Material for this manuscript includes the following:**

Dataset S1

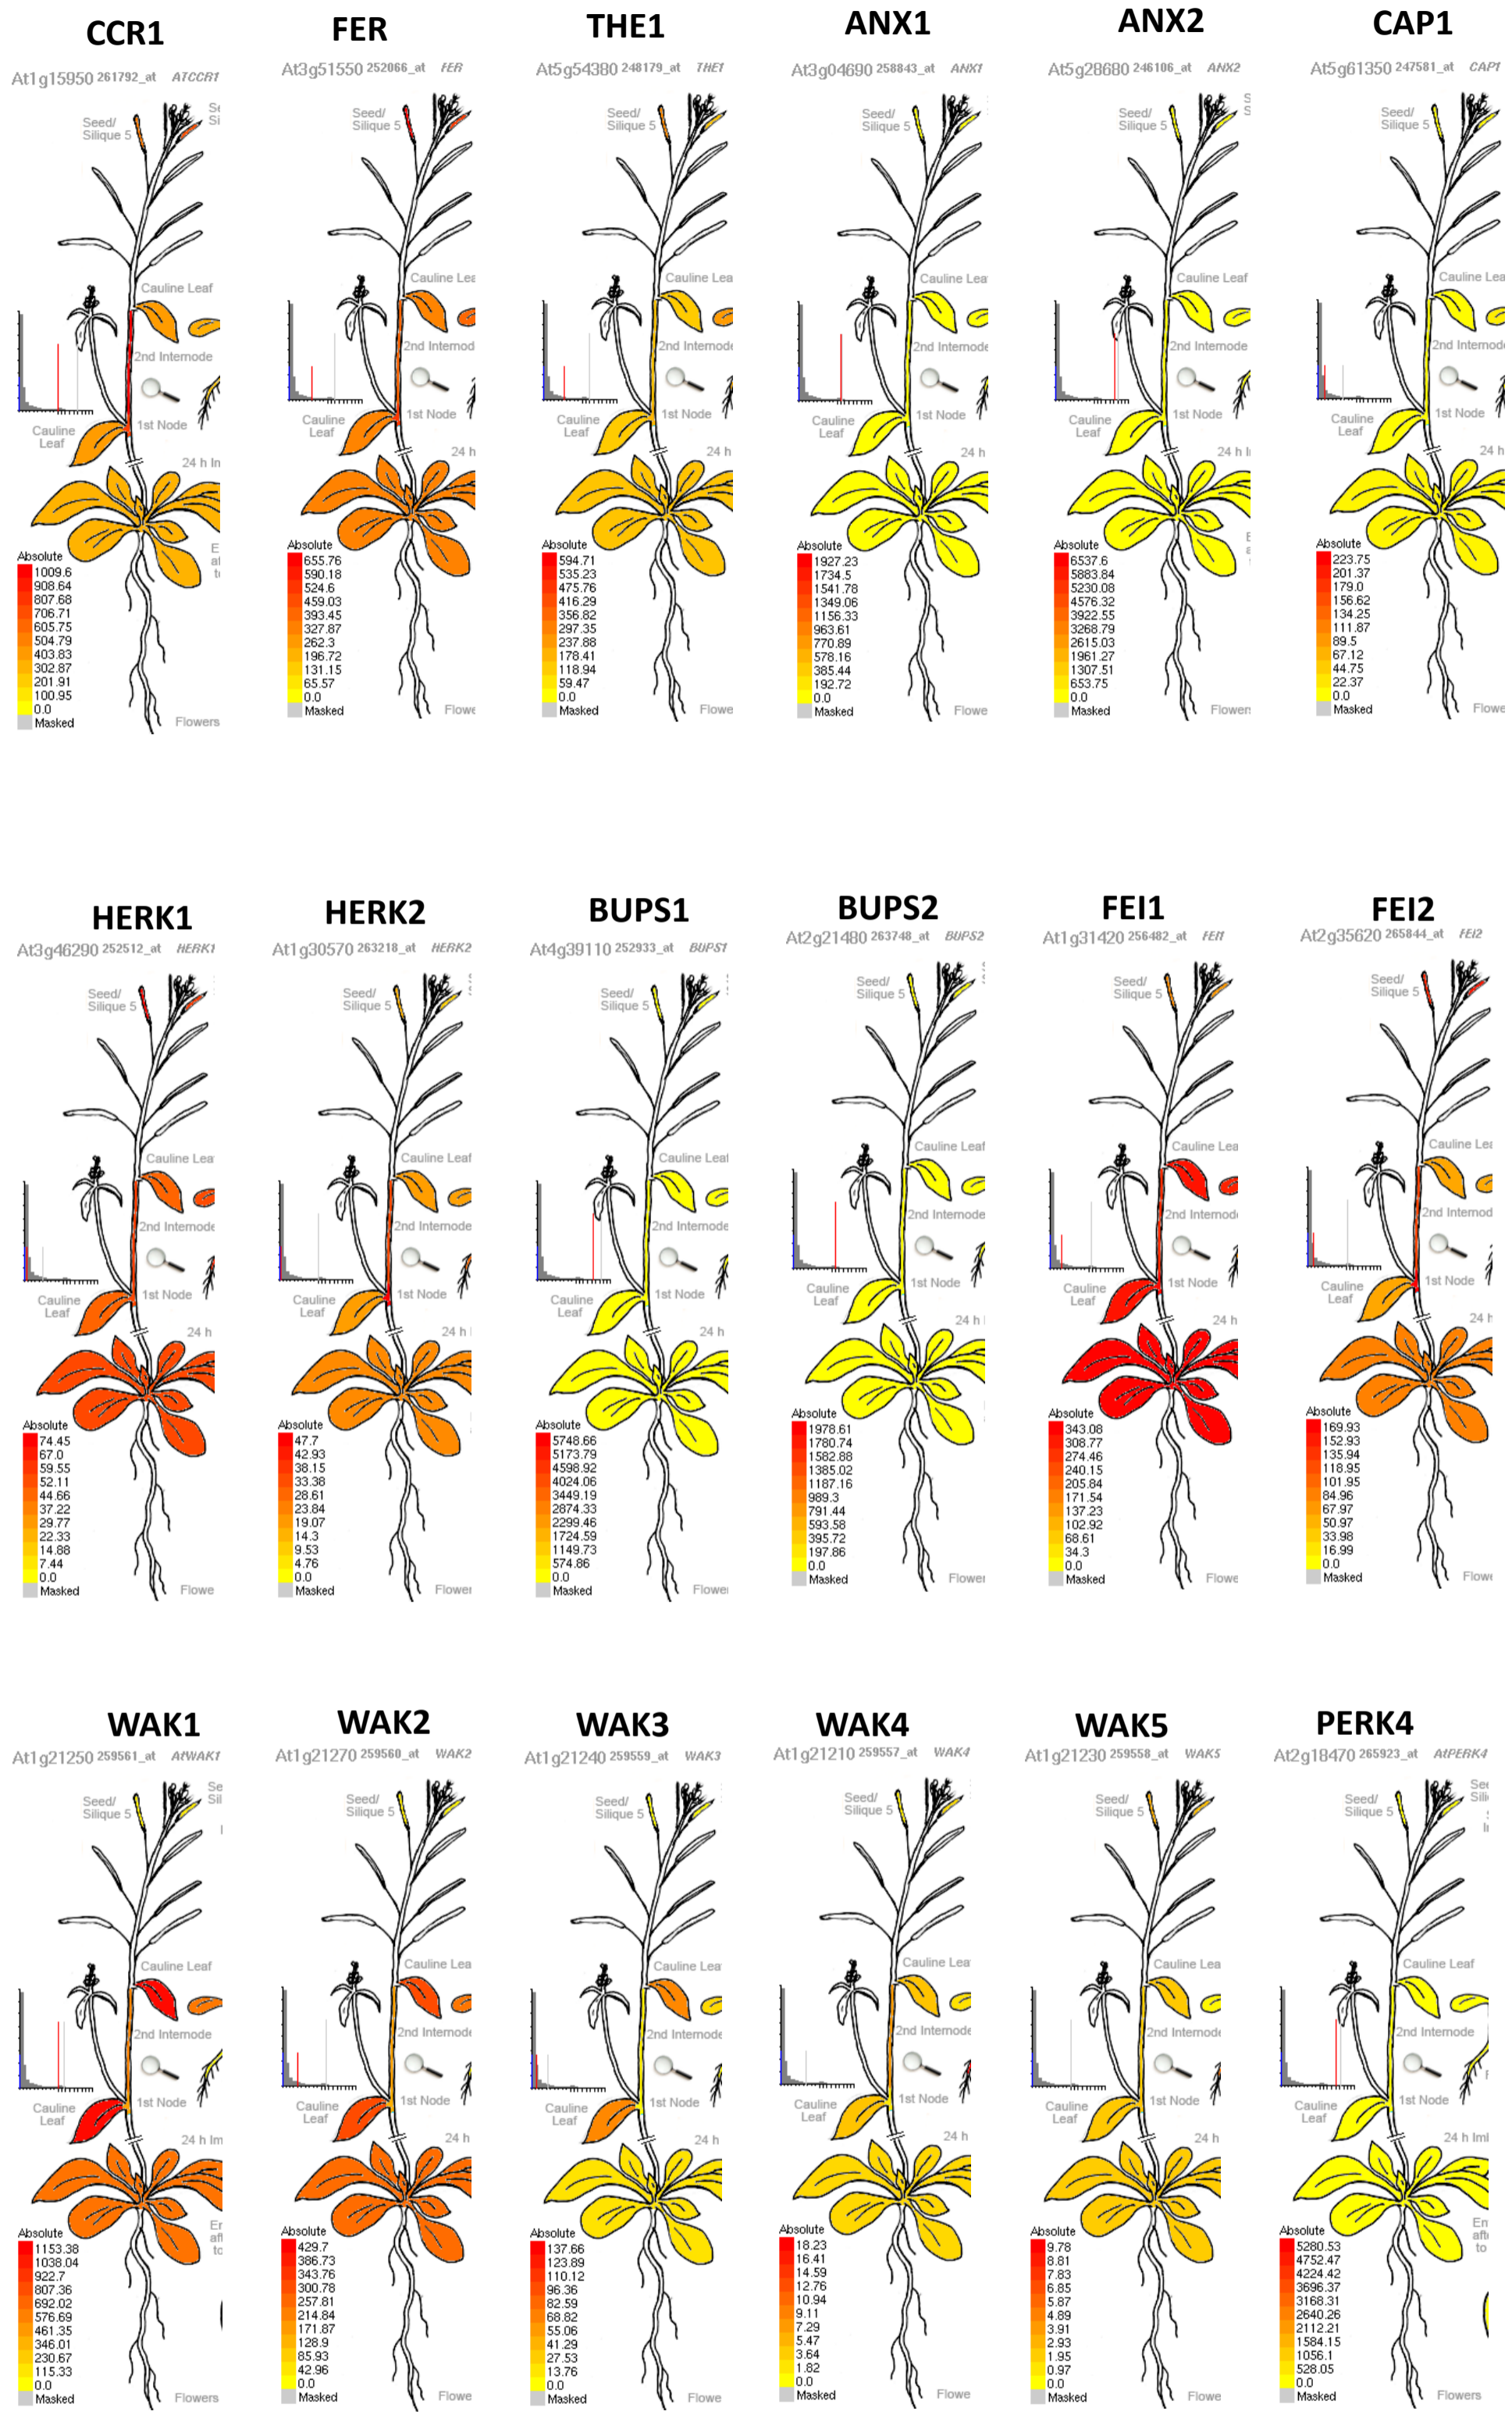

**Supplementary Fig. 1**

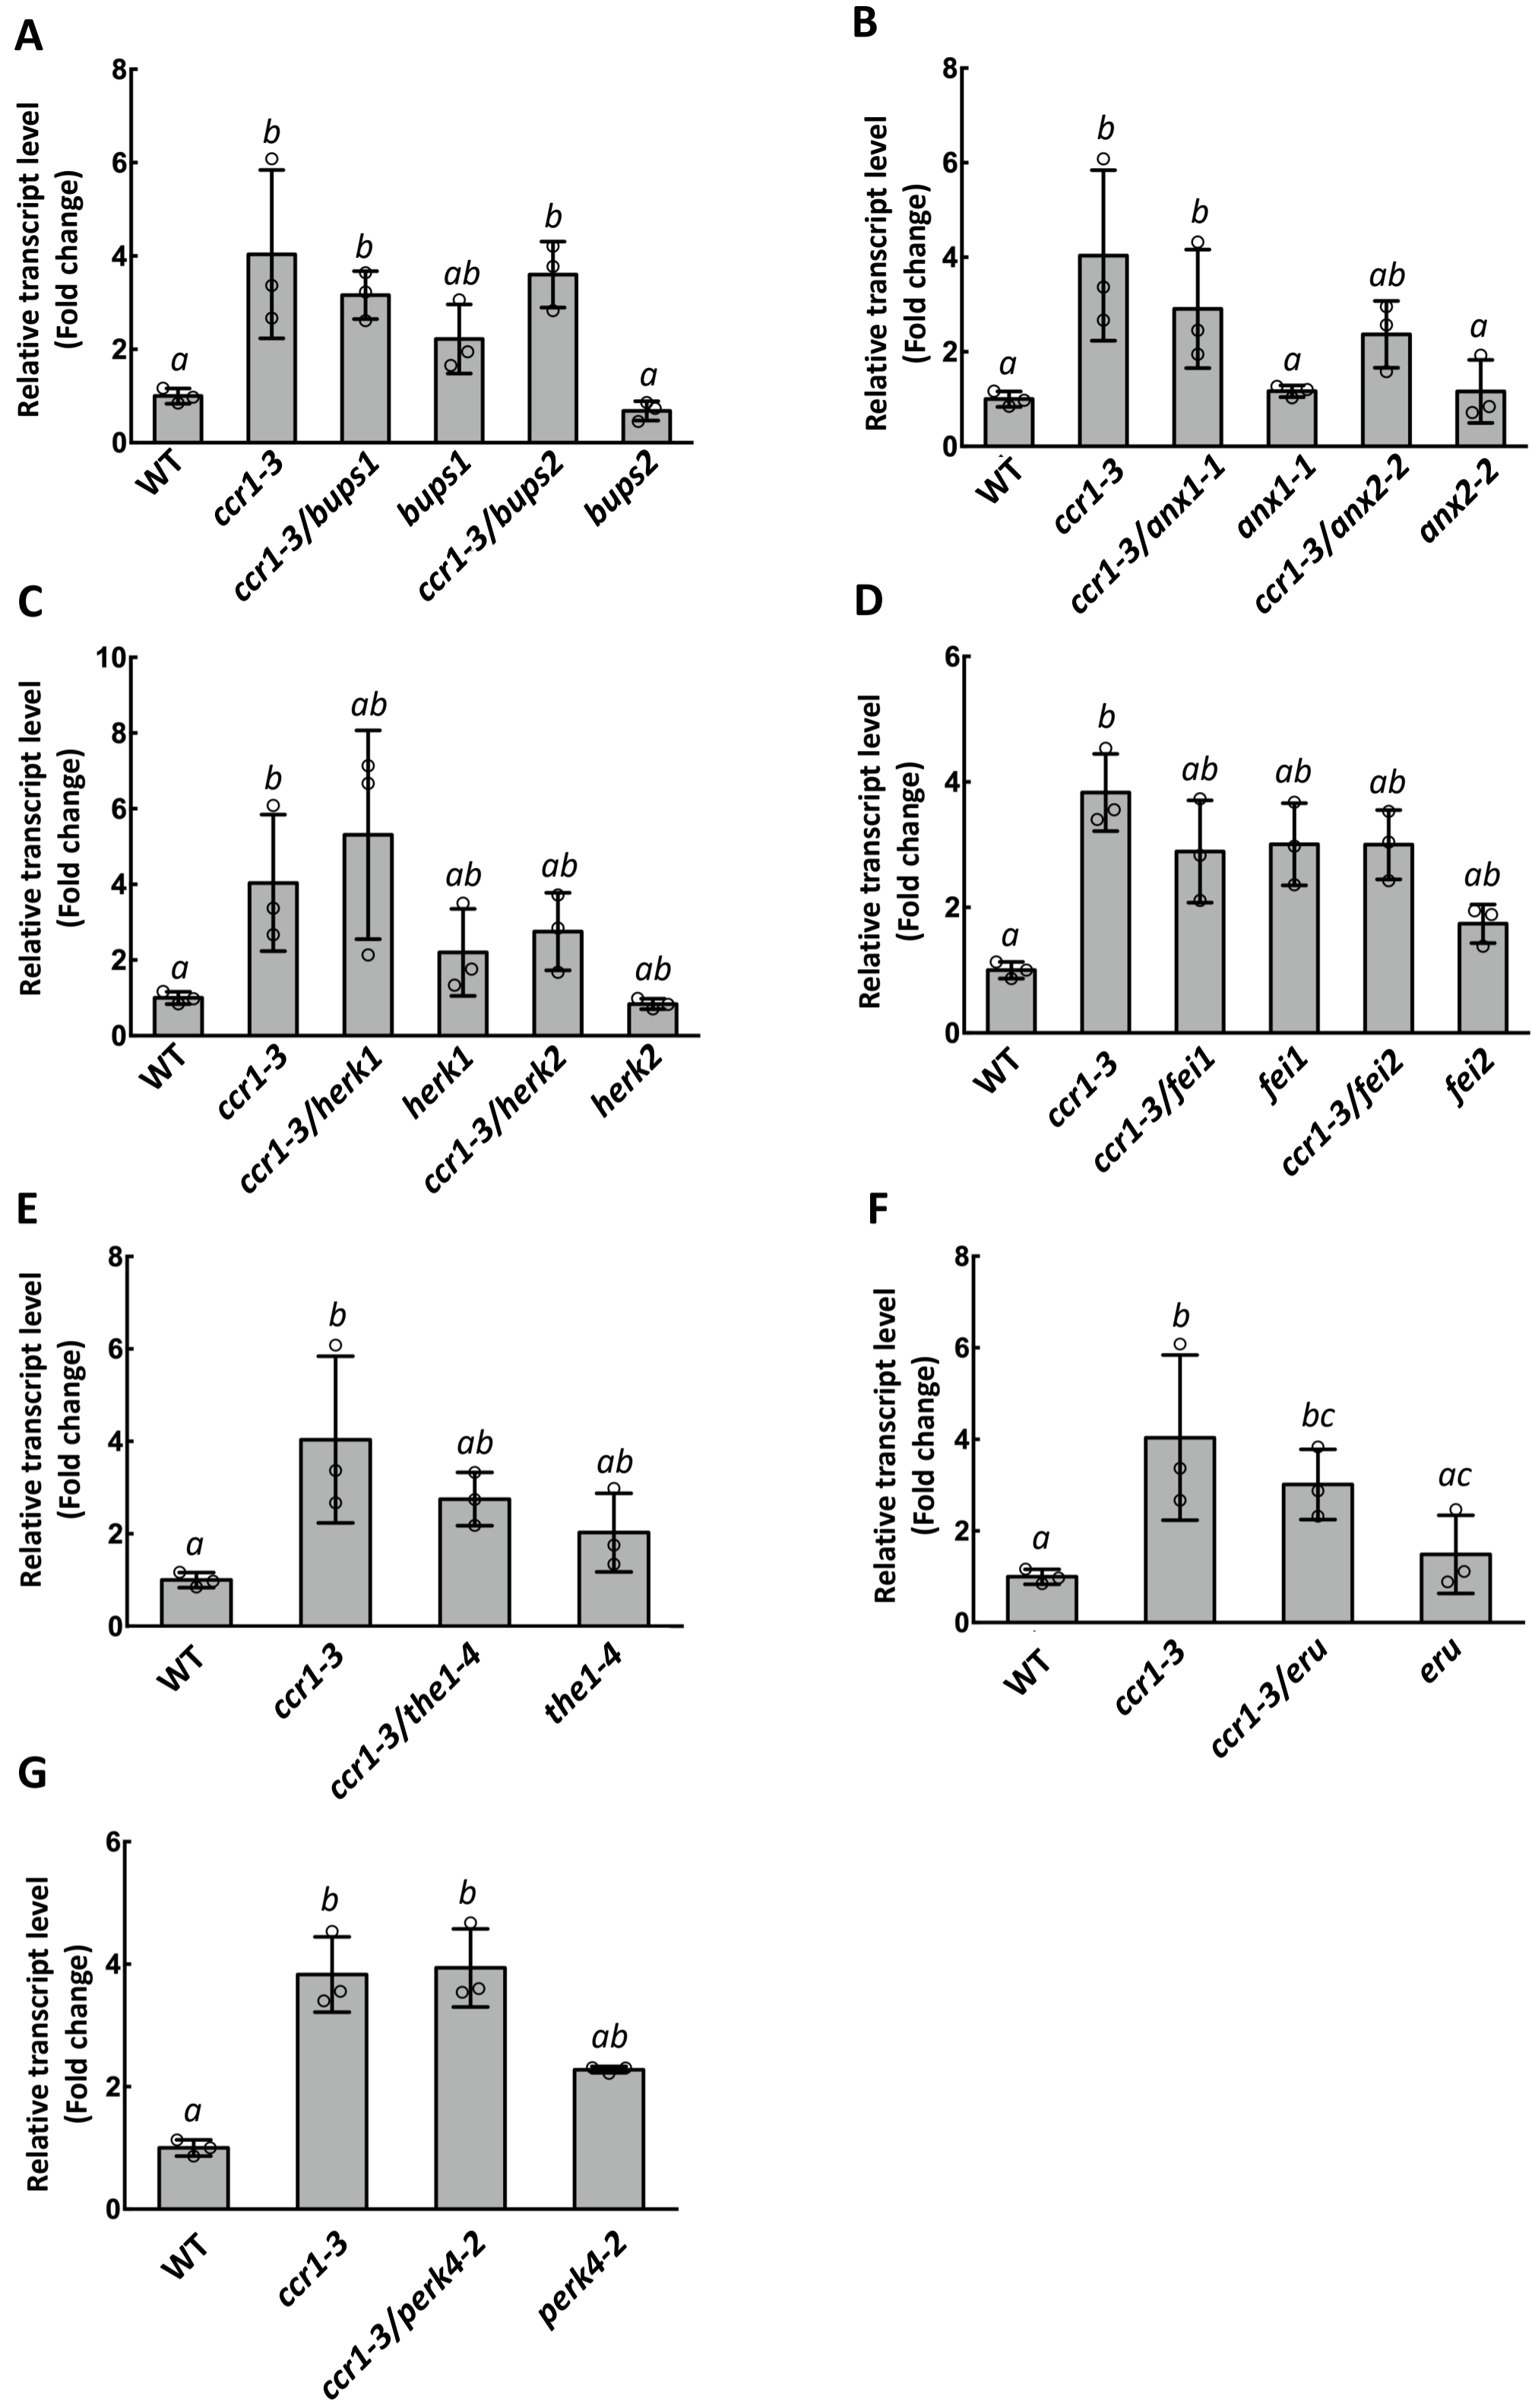

Supplementary Fig. 2.

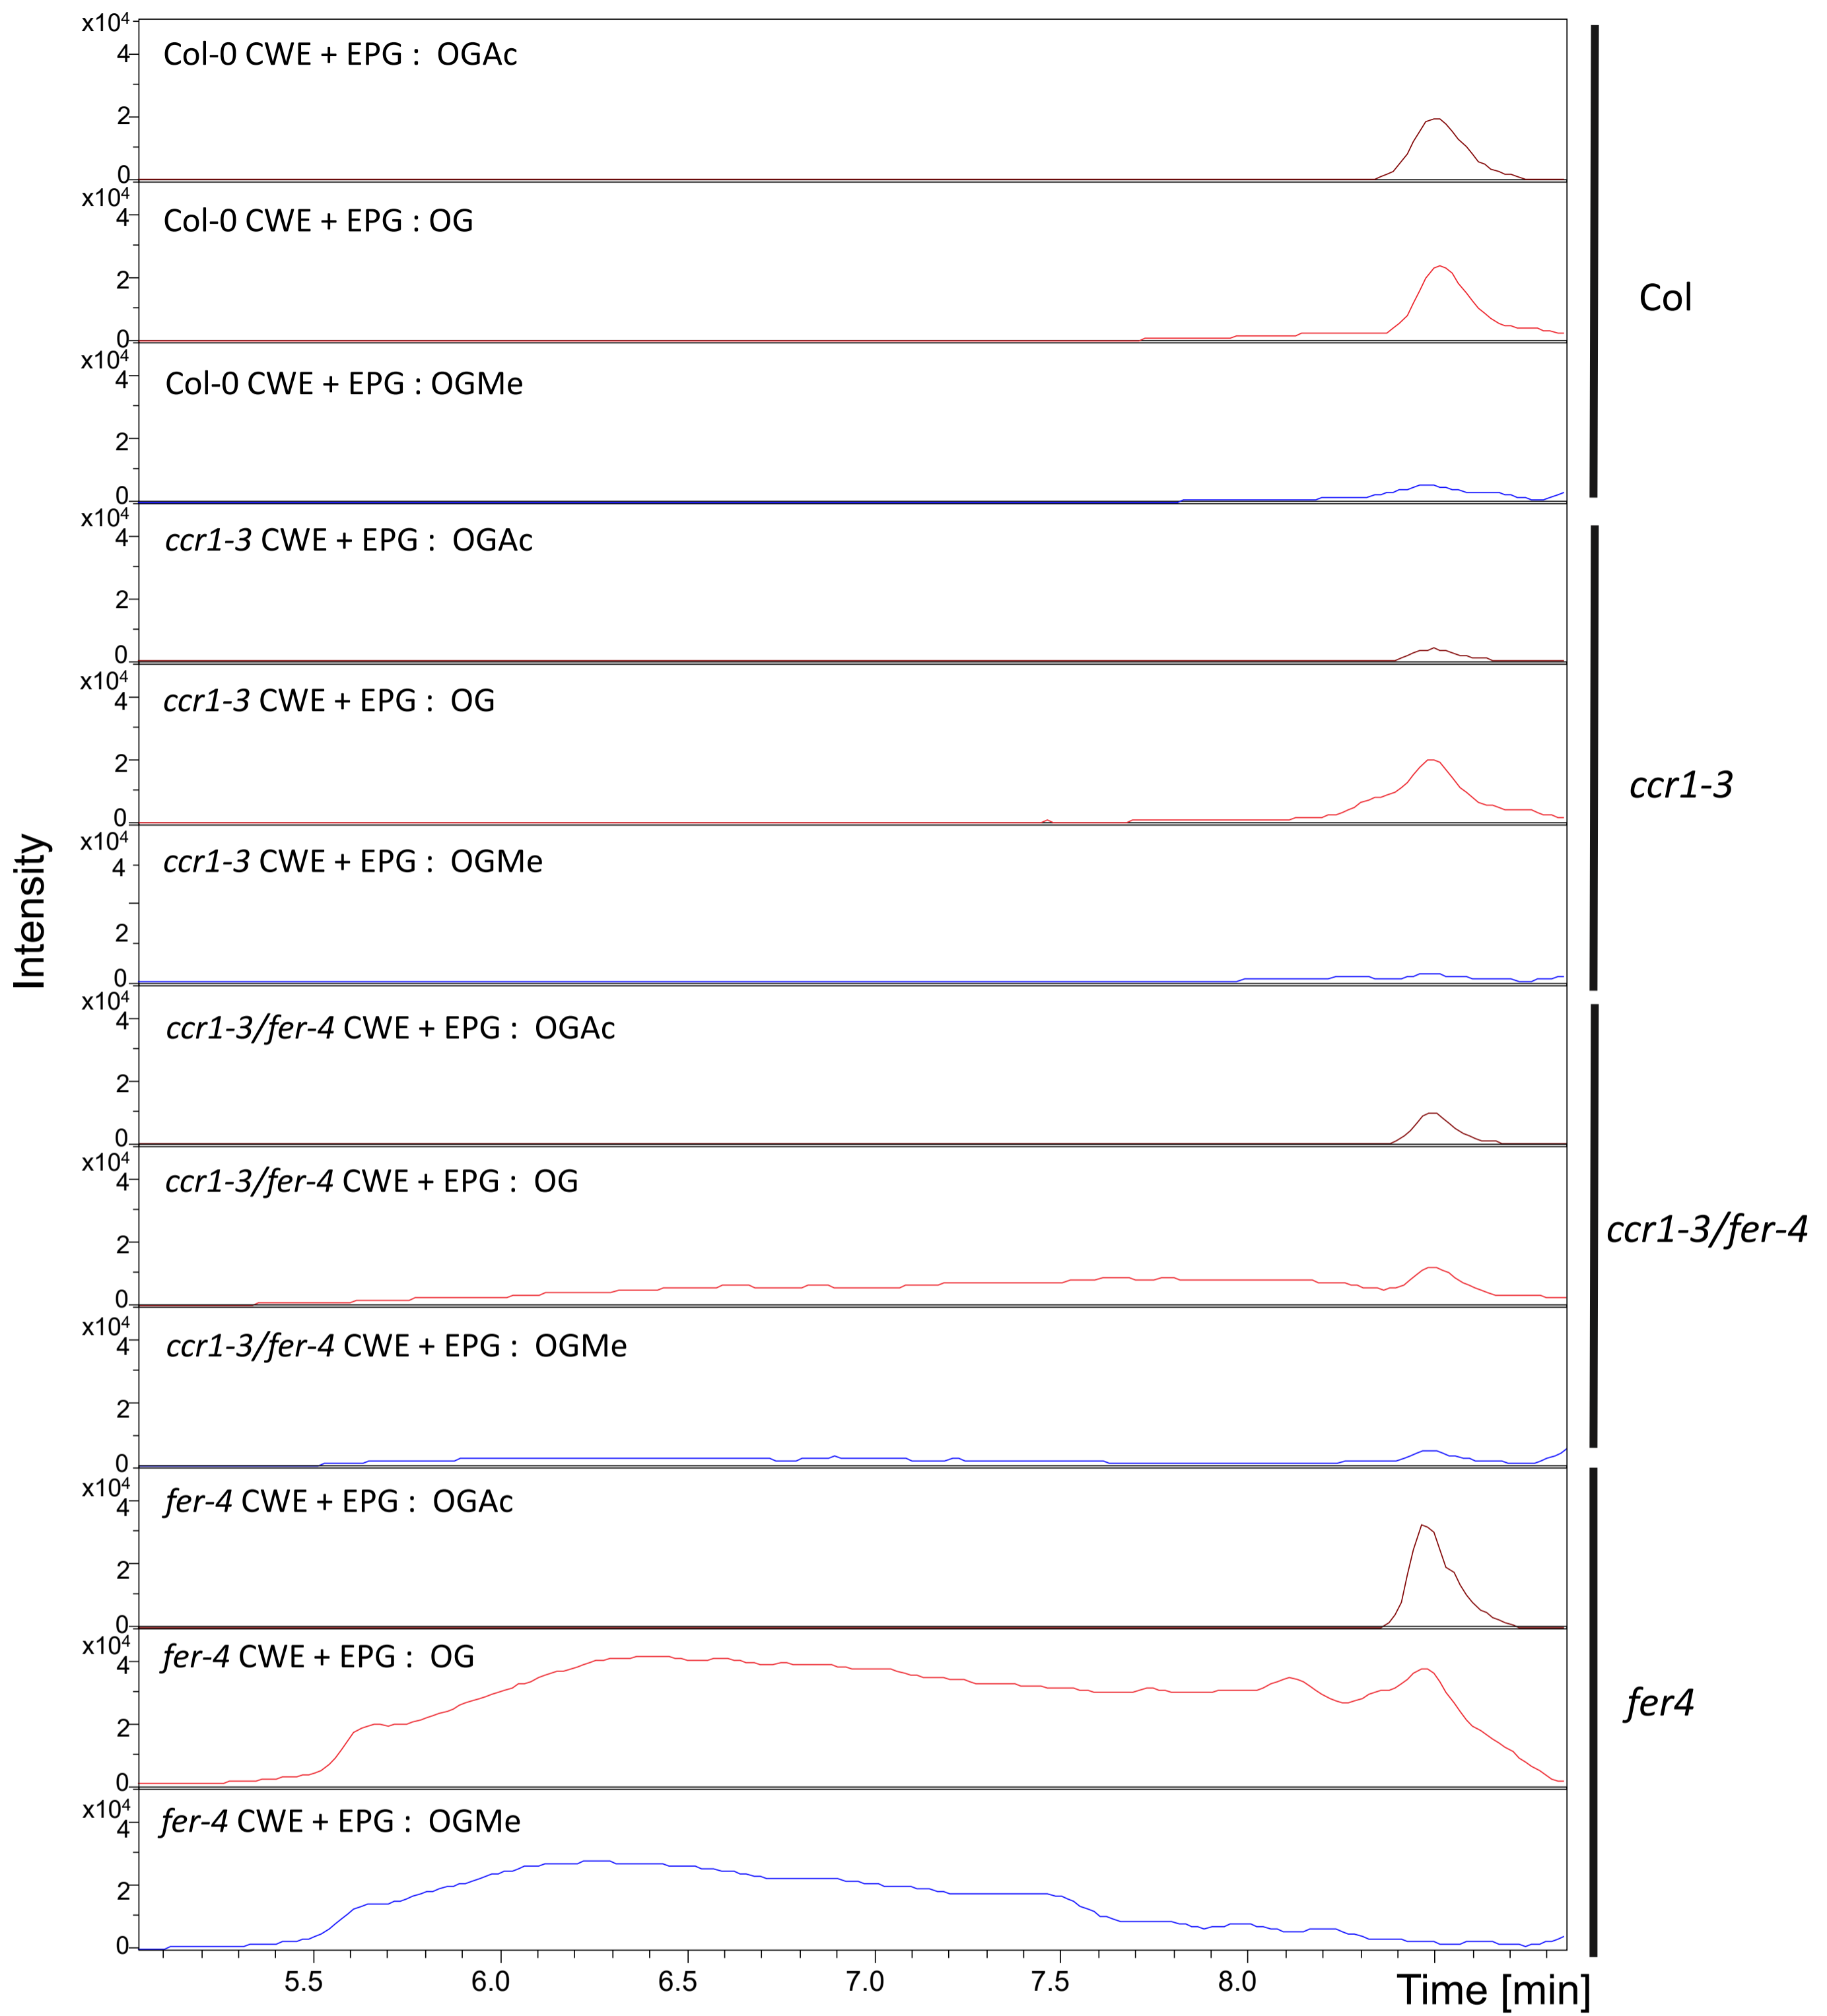

**Supplementary Fig. 3.**

**A**

|     |     |               |           |  |
|-----|-----|---------------|-----------|--|
| +Ox | 589 | Pent3UA       | C21H33O19 |  |
| +Me | 605 | Pent3UAox     | C21H33O20 |  |
|     | 619 | Pent3UAMeox   | C22H35O20 |  |
| +Ac | 661 | Pent3UAMeAcox | C24H37O21 |  |
|     | 723 | Pent4HexOx    | C26H43O23 |  |
|     | 737 | Pent4HexMeOx  | C27H45O23 |  |
|     | 751 | Pent4UAMeox   | C27H43O24 |  |
|     | 779 | Pent3UA2Me    | C28H43O25 |  |
|     | 793 | Pent3UA2Me2   | C29H45O25 |  |
|     | 853 | Pent5UA       | C31H49O27 |  |
|     | 867 | Pent5UAMe     | C32H51O27 |  |

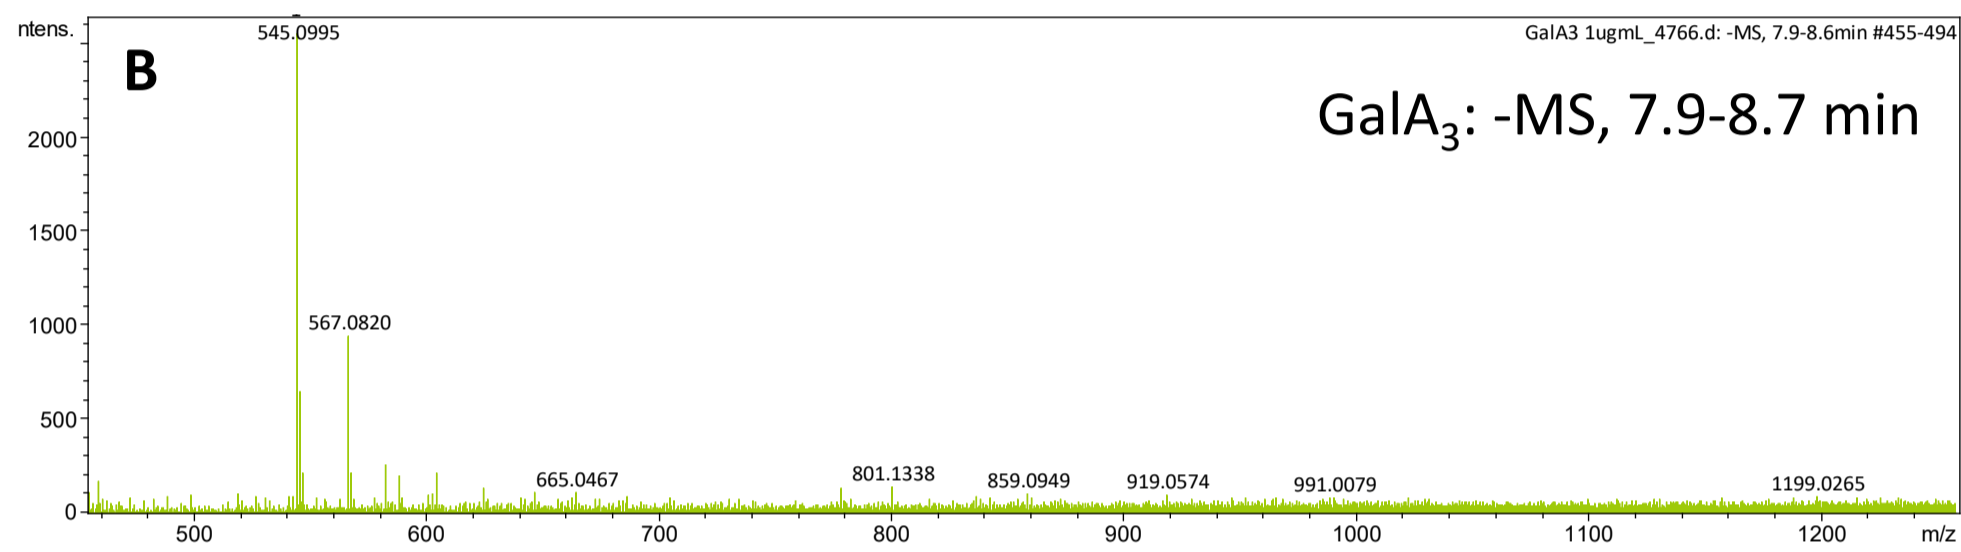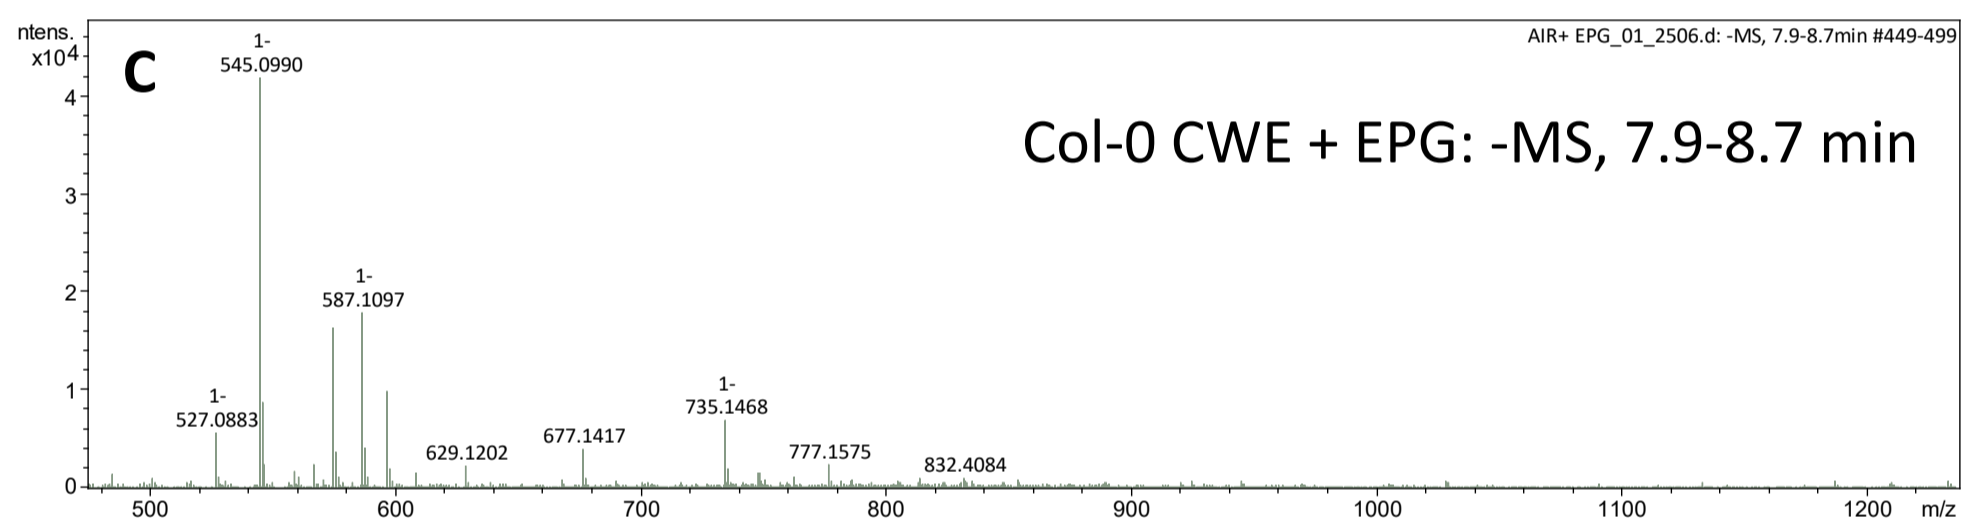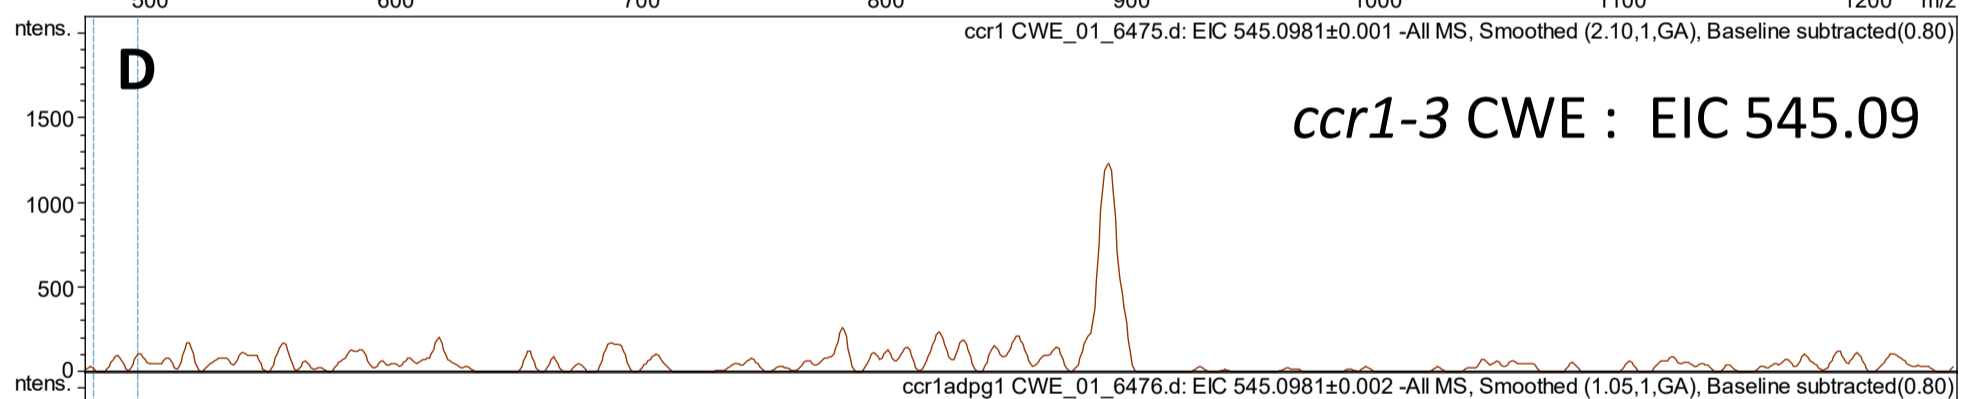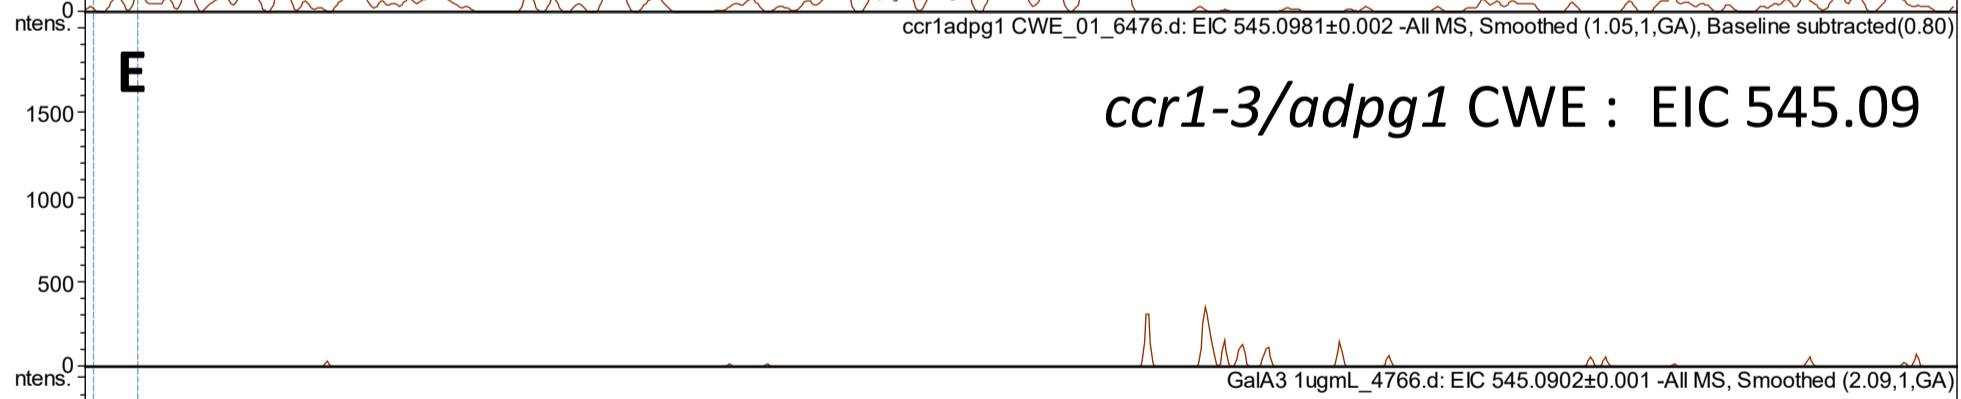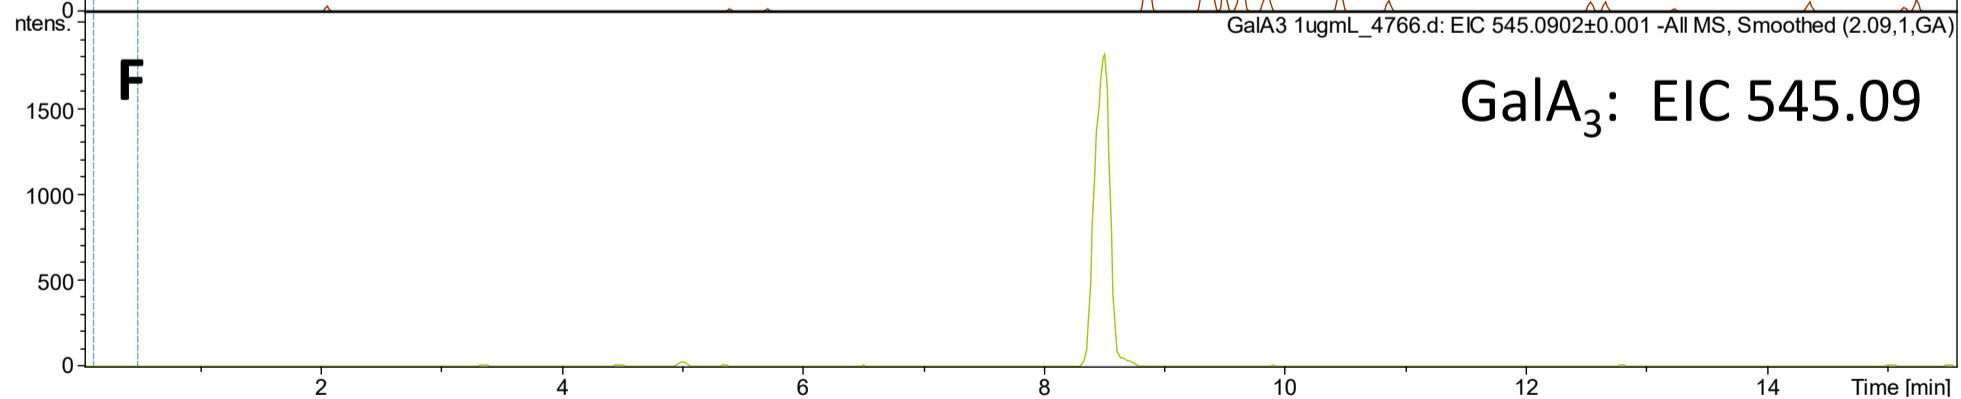

**Supplementary Fig. 4.**

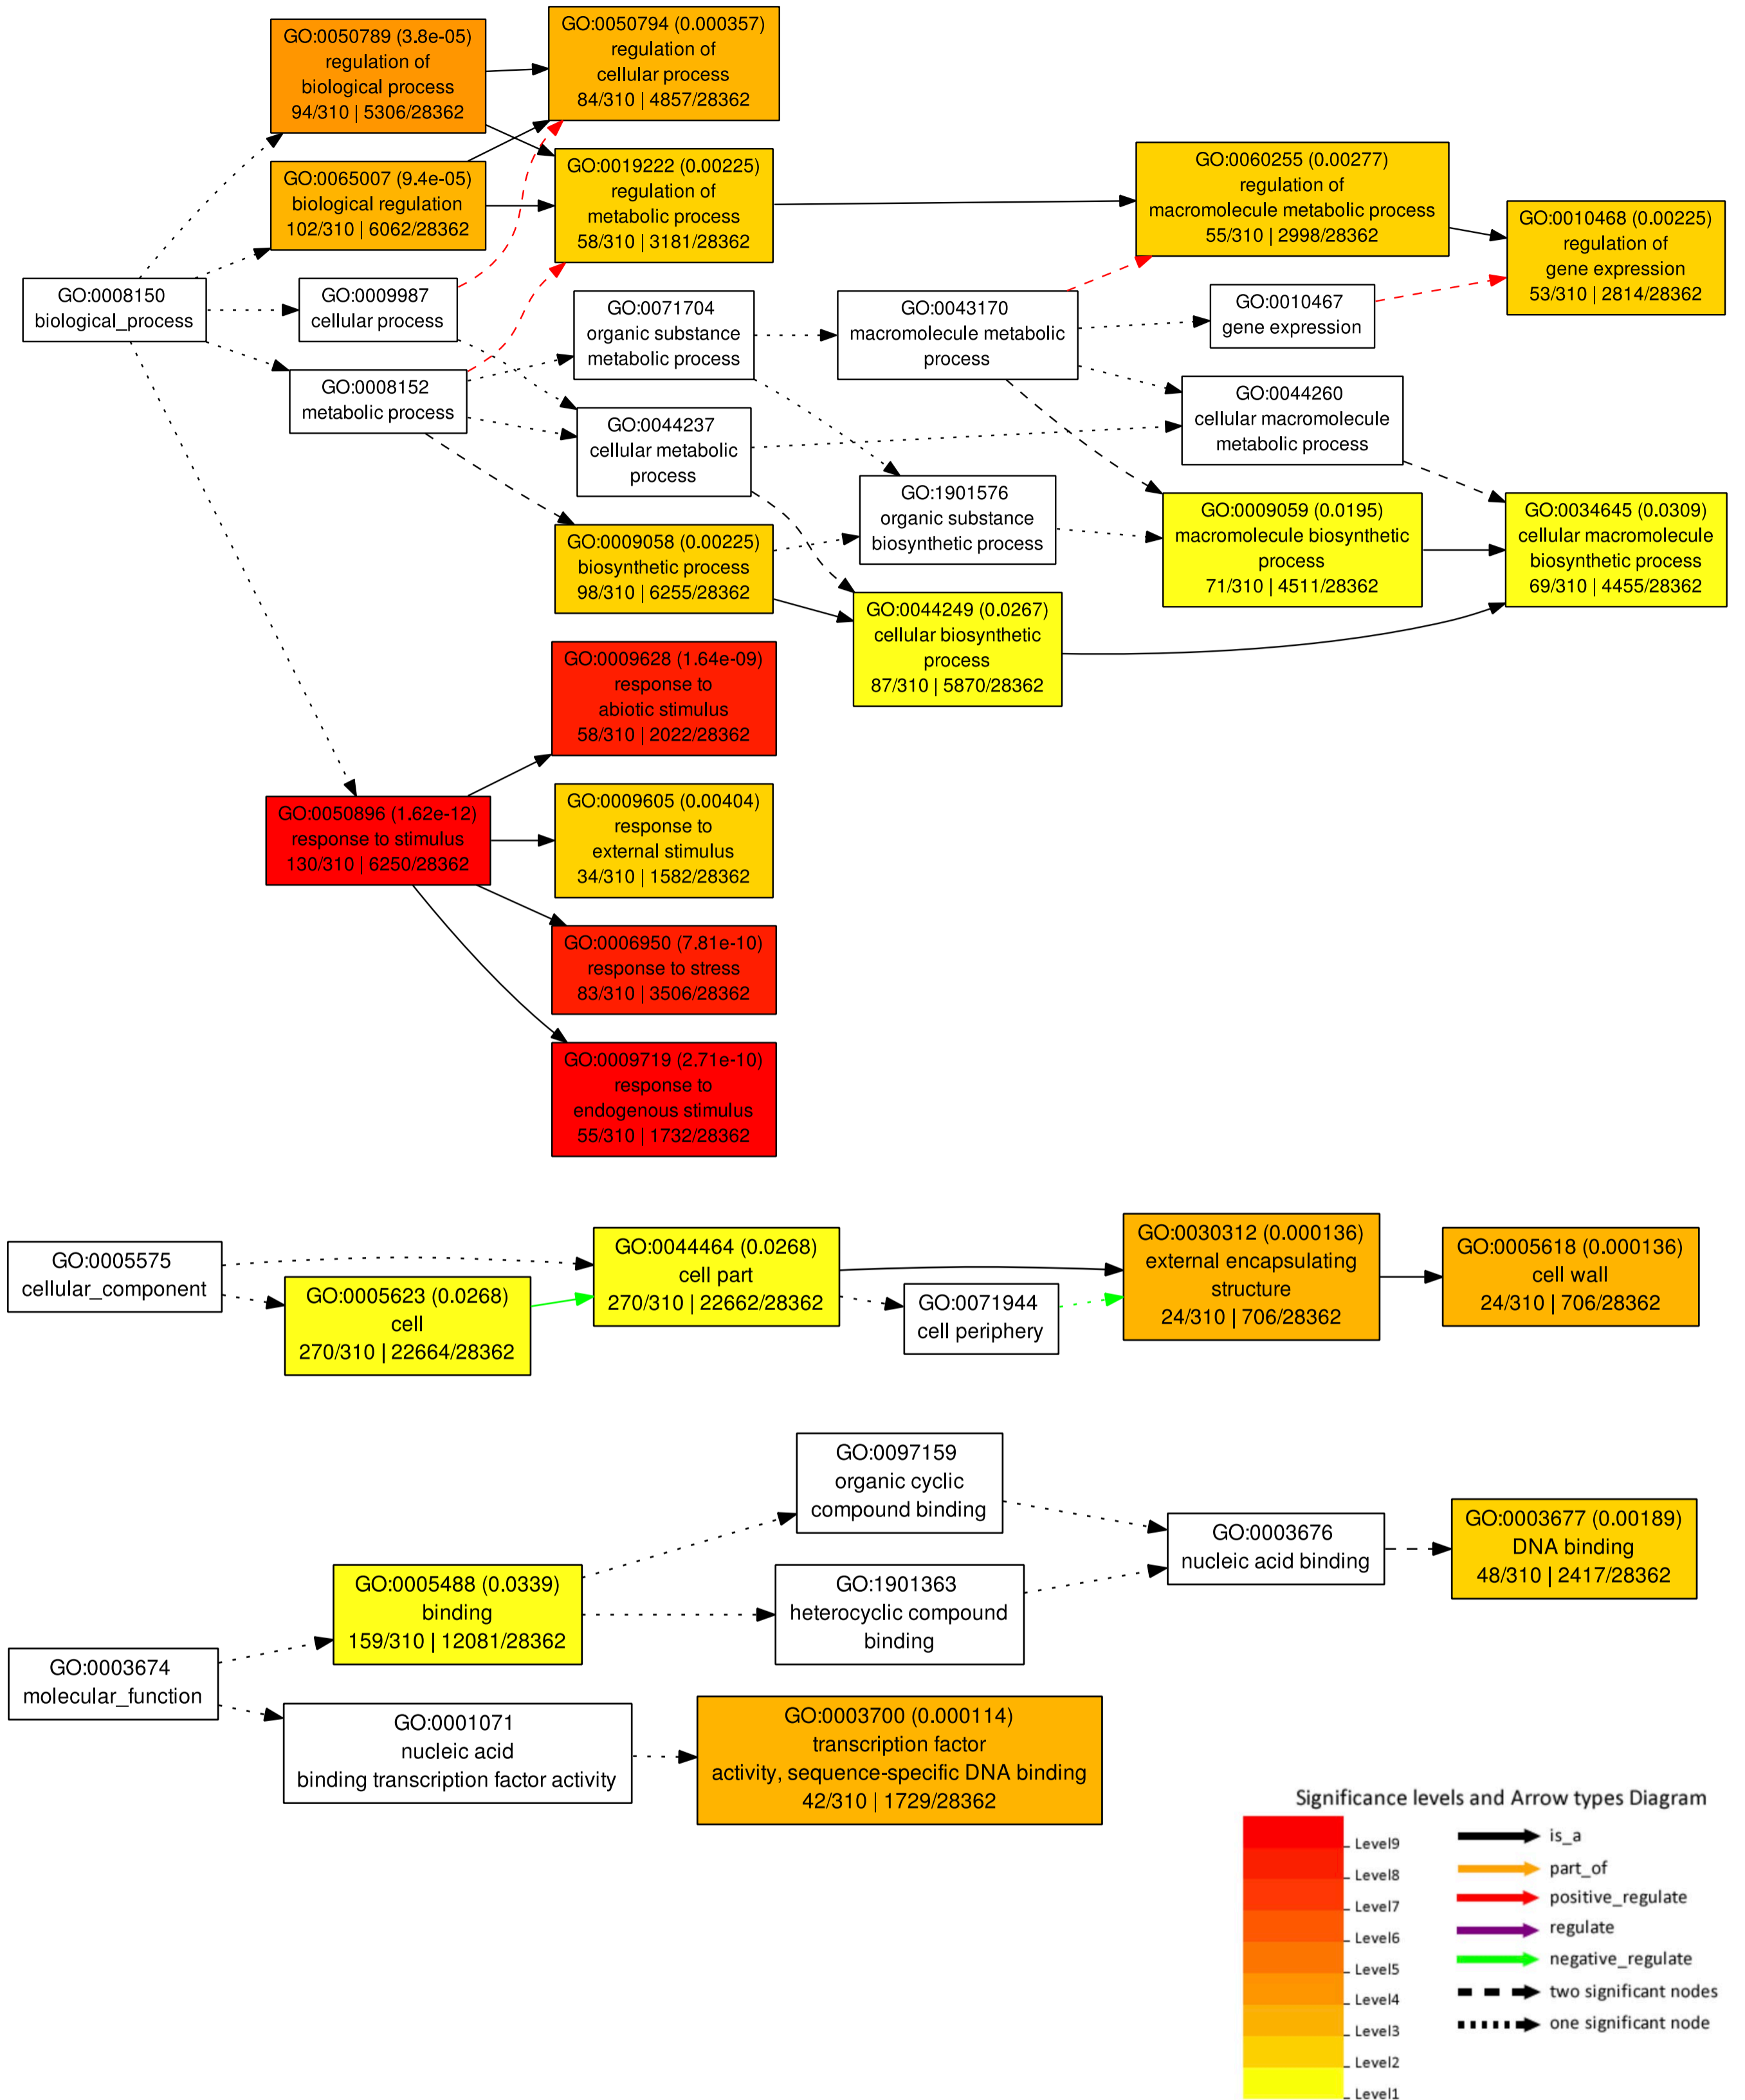

Supplementary Fig. 5.

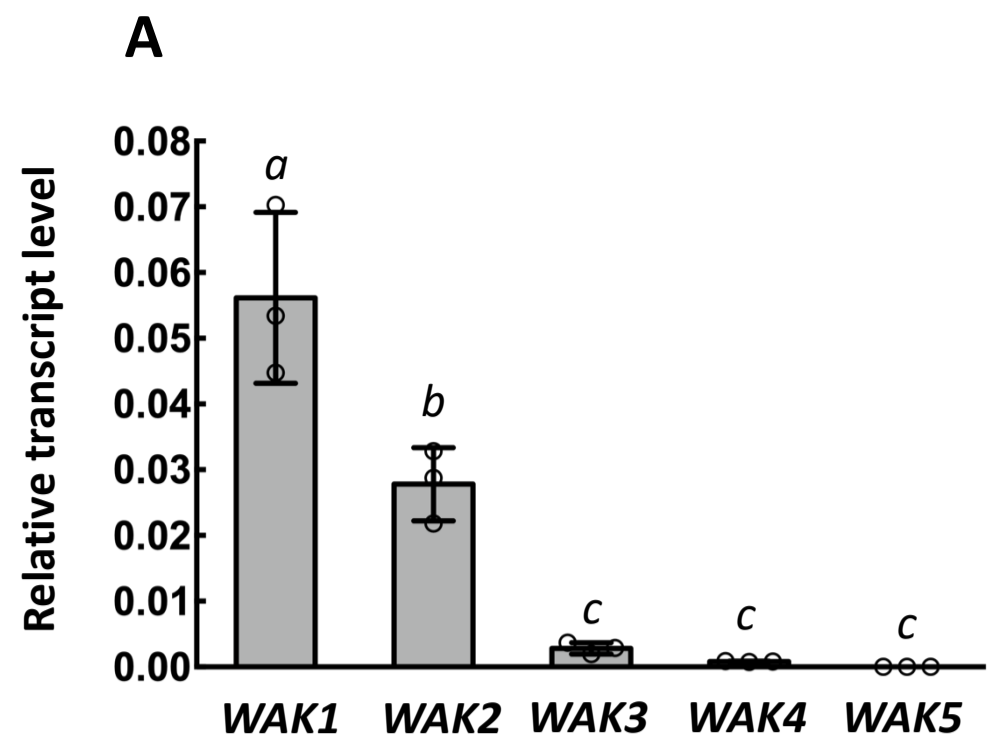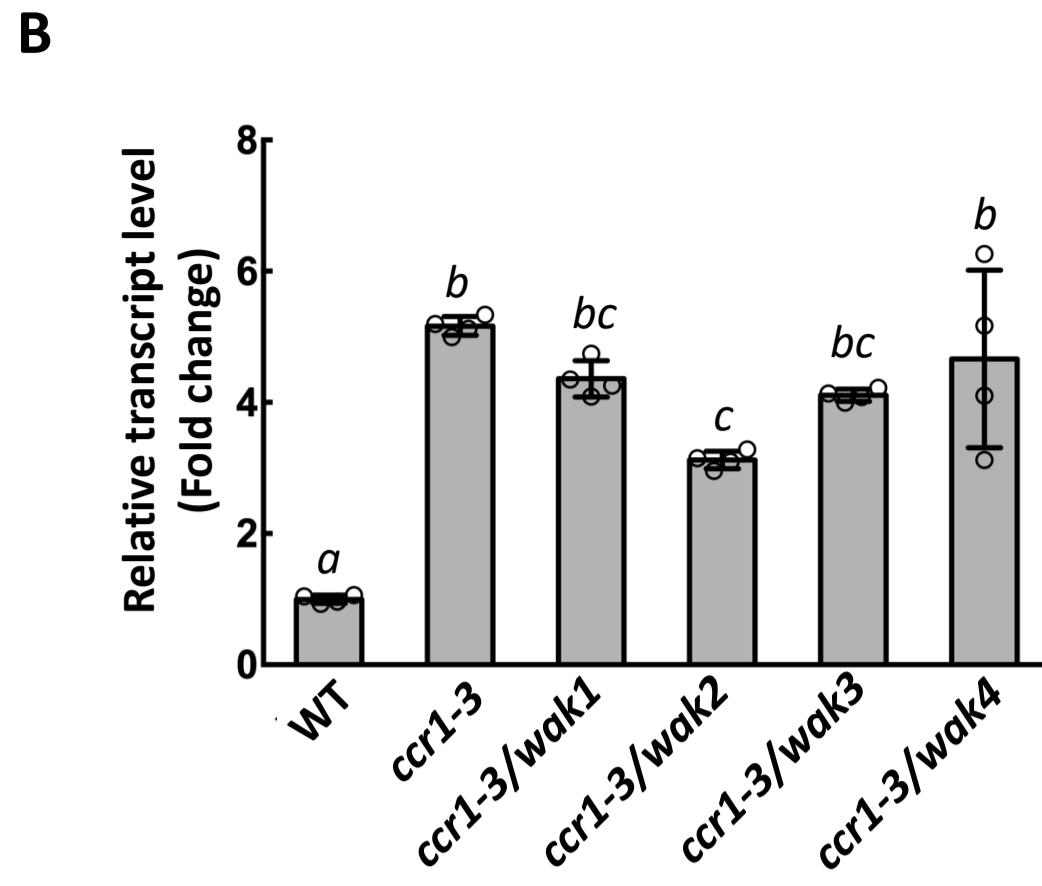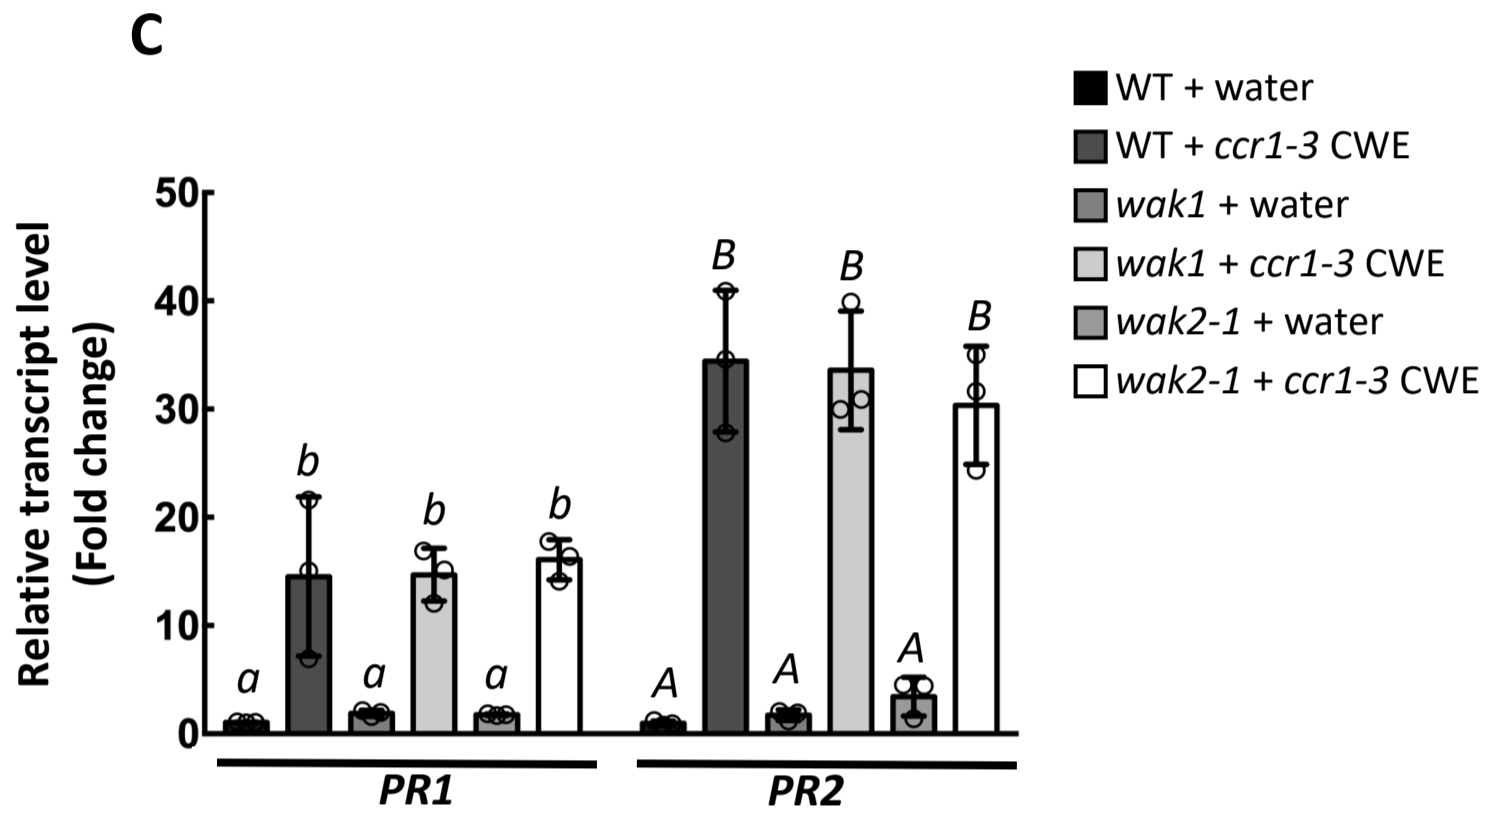

Supplementary Fig. 6.

A

| Transgenic line | Target sequence (N19NGG)                       | Indel |
|-----------------|------------------------------------------------|-------|
| Wild type WAK1  | GGTCAGGGTGGCCAAGGAACAGTGTACAAAGGGATATTGCCGGAC  | -     |
| <i>wak1/2-1</i> | GGTCAGGGTGGCCAAGGAACA-----ACAAAGGGATATTGCCGGAC | -4    |
| <i>wak1/2-2</i> | GGTCAGGGTGGCCAAGGAACAGTGTACAAAGGGATATTGCCGGAC  | +1    |
| Wild type WAK2  | GGTCAGGGAGGCCAAGGAACAGTGTACAAAGGGATATTGCCGGAC  | -     |
| <i>wak1/2-1</i> | GGTCAGGGAGGCCAAGGAACAGTGT--AAAGGGATATTGCCGGAC  | -2    |
| <i>wak1/2-2</i> | GGTCAGGGAGGCCAAGGAACA-----ACAAAGGGATATTGCCGGAC | -4    |

B

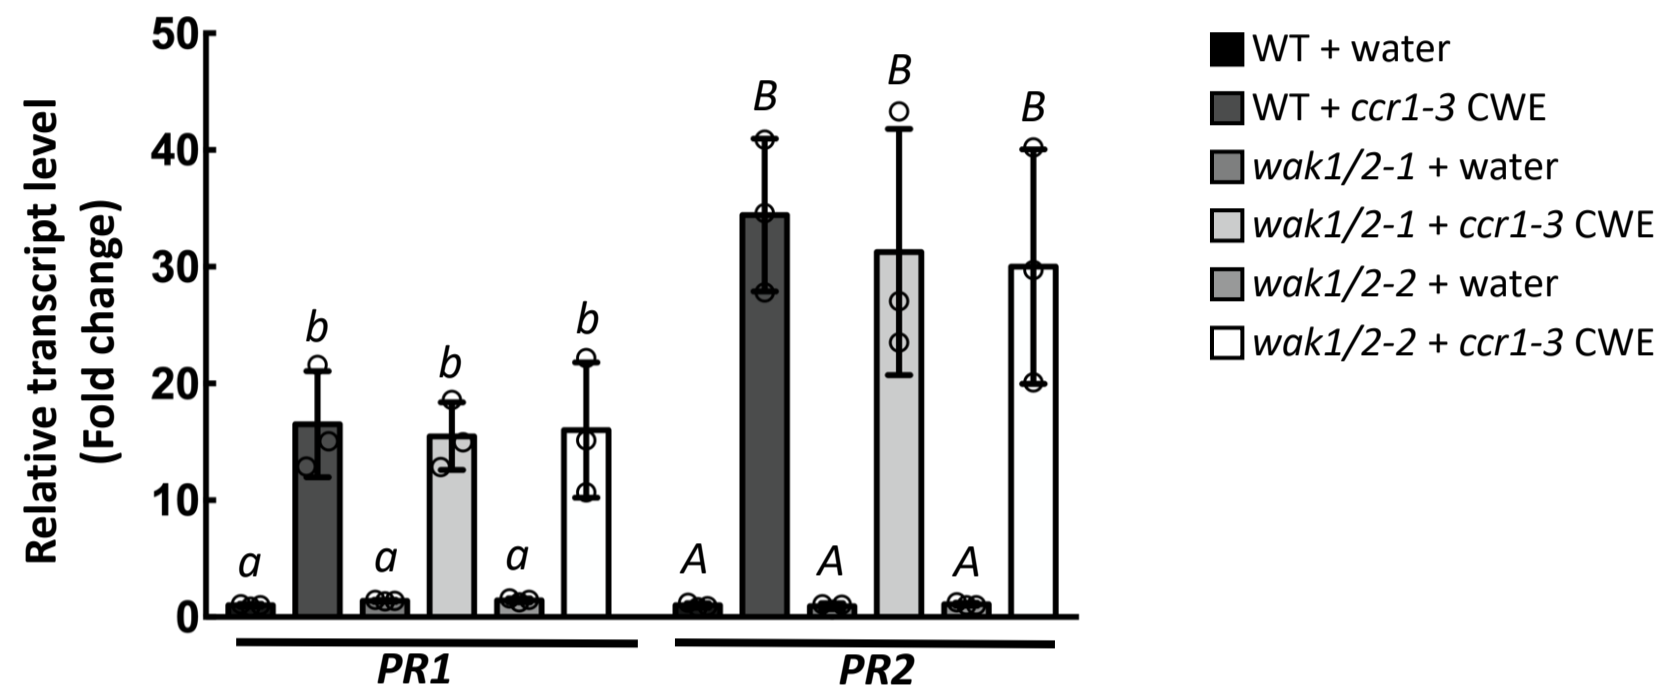

Supplementary Fig. 7.



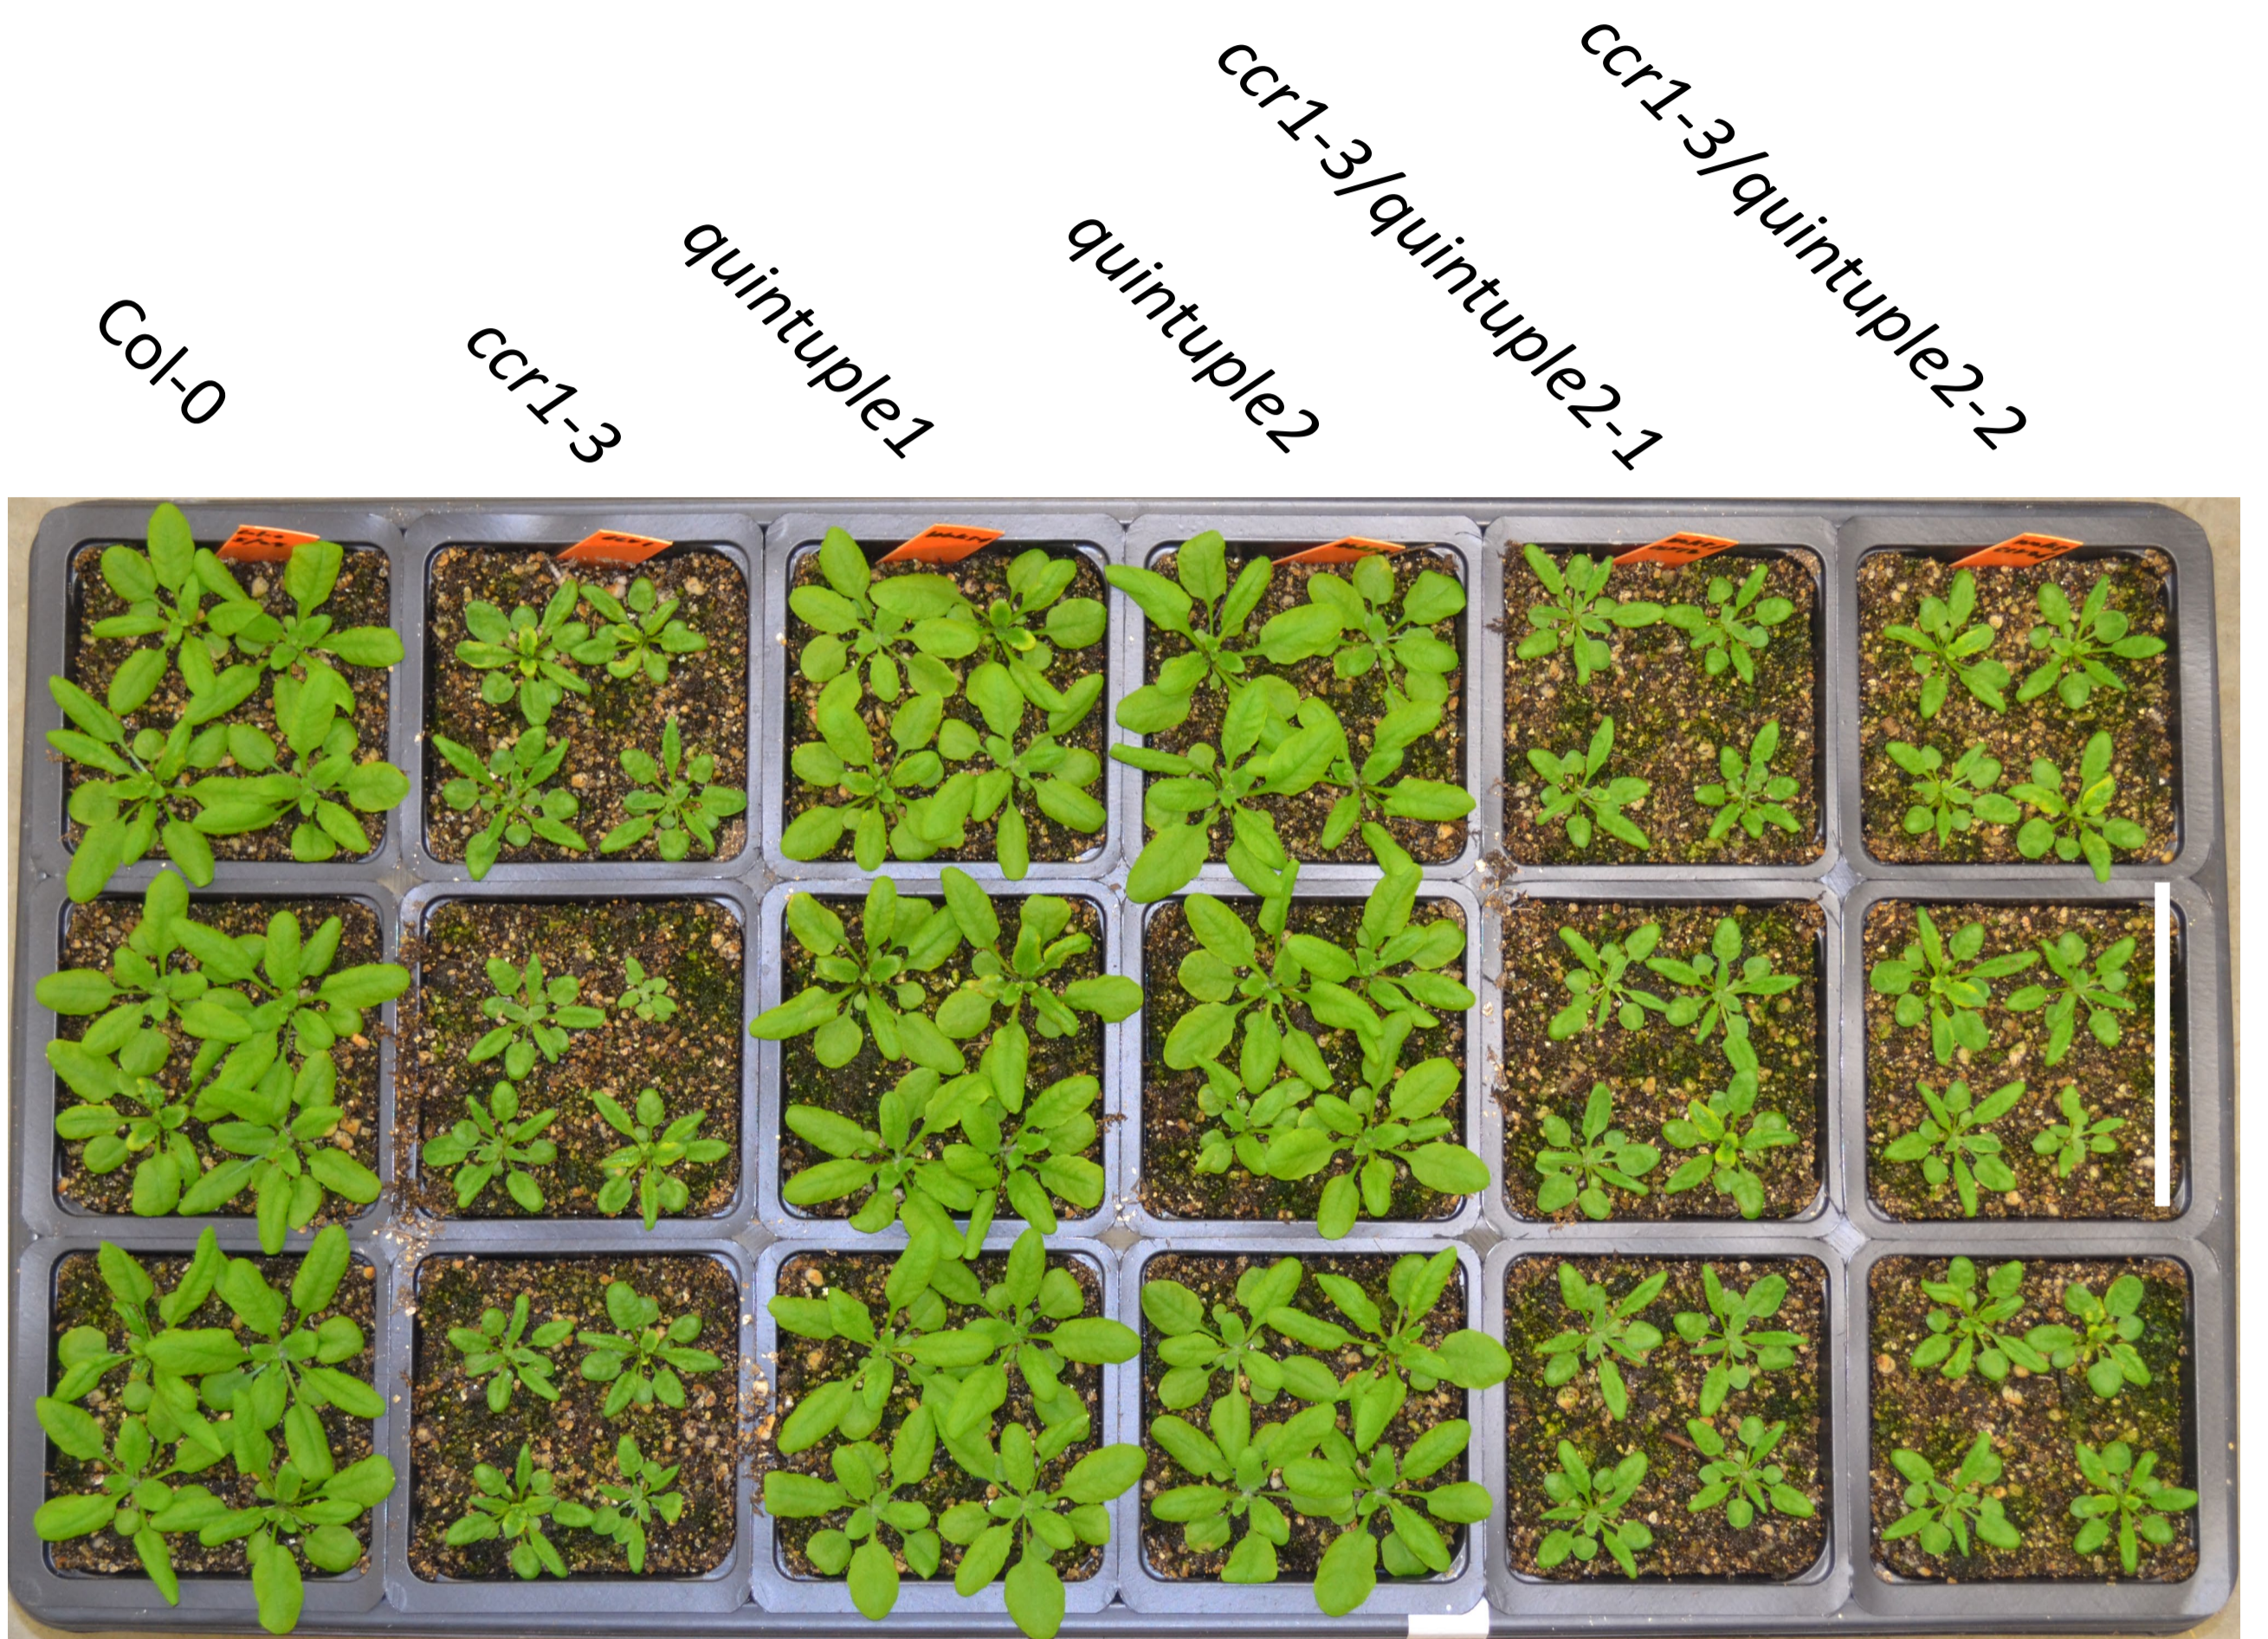

Supplementary Fig. 8.

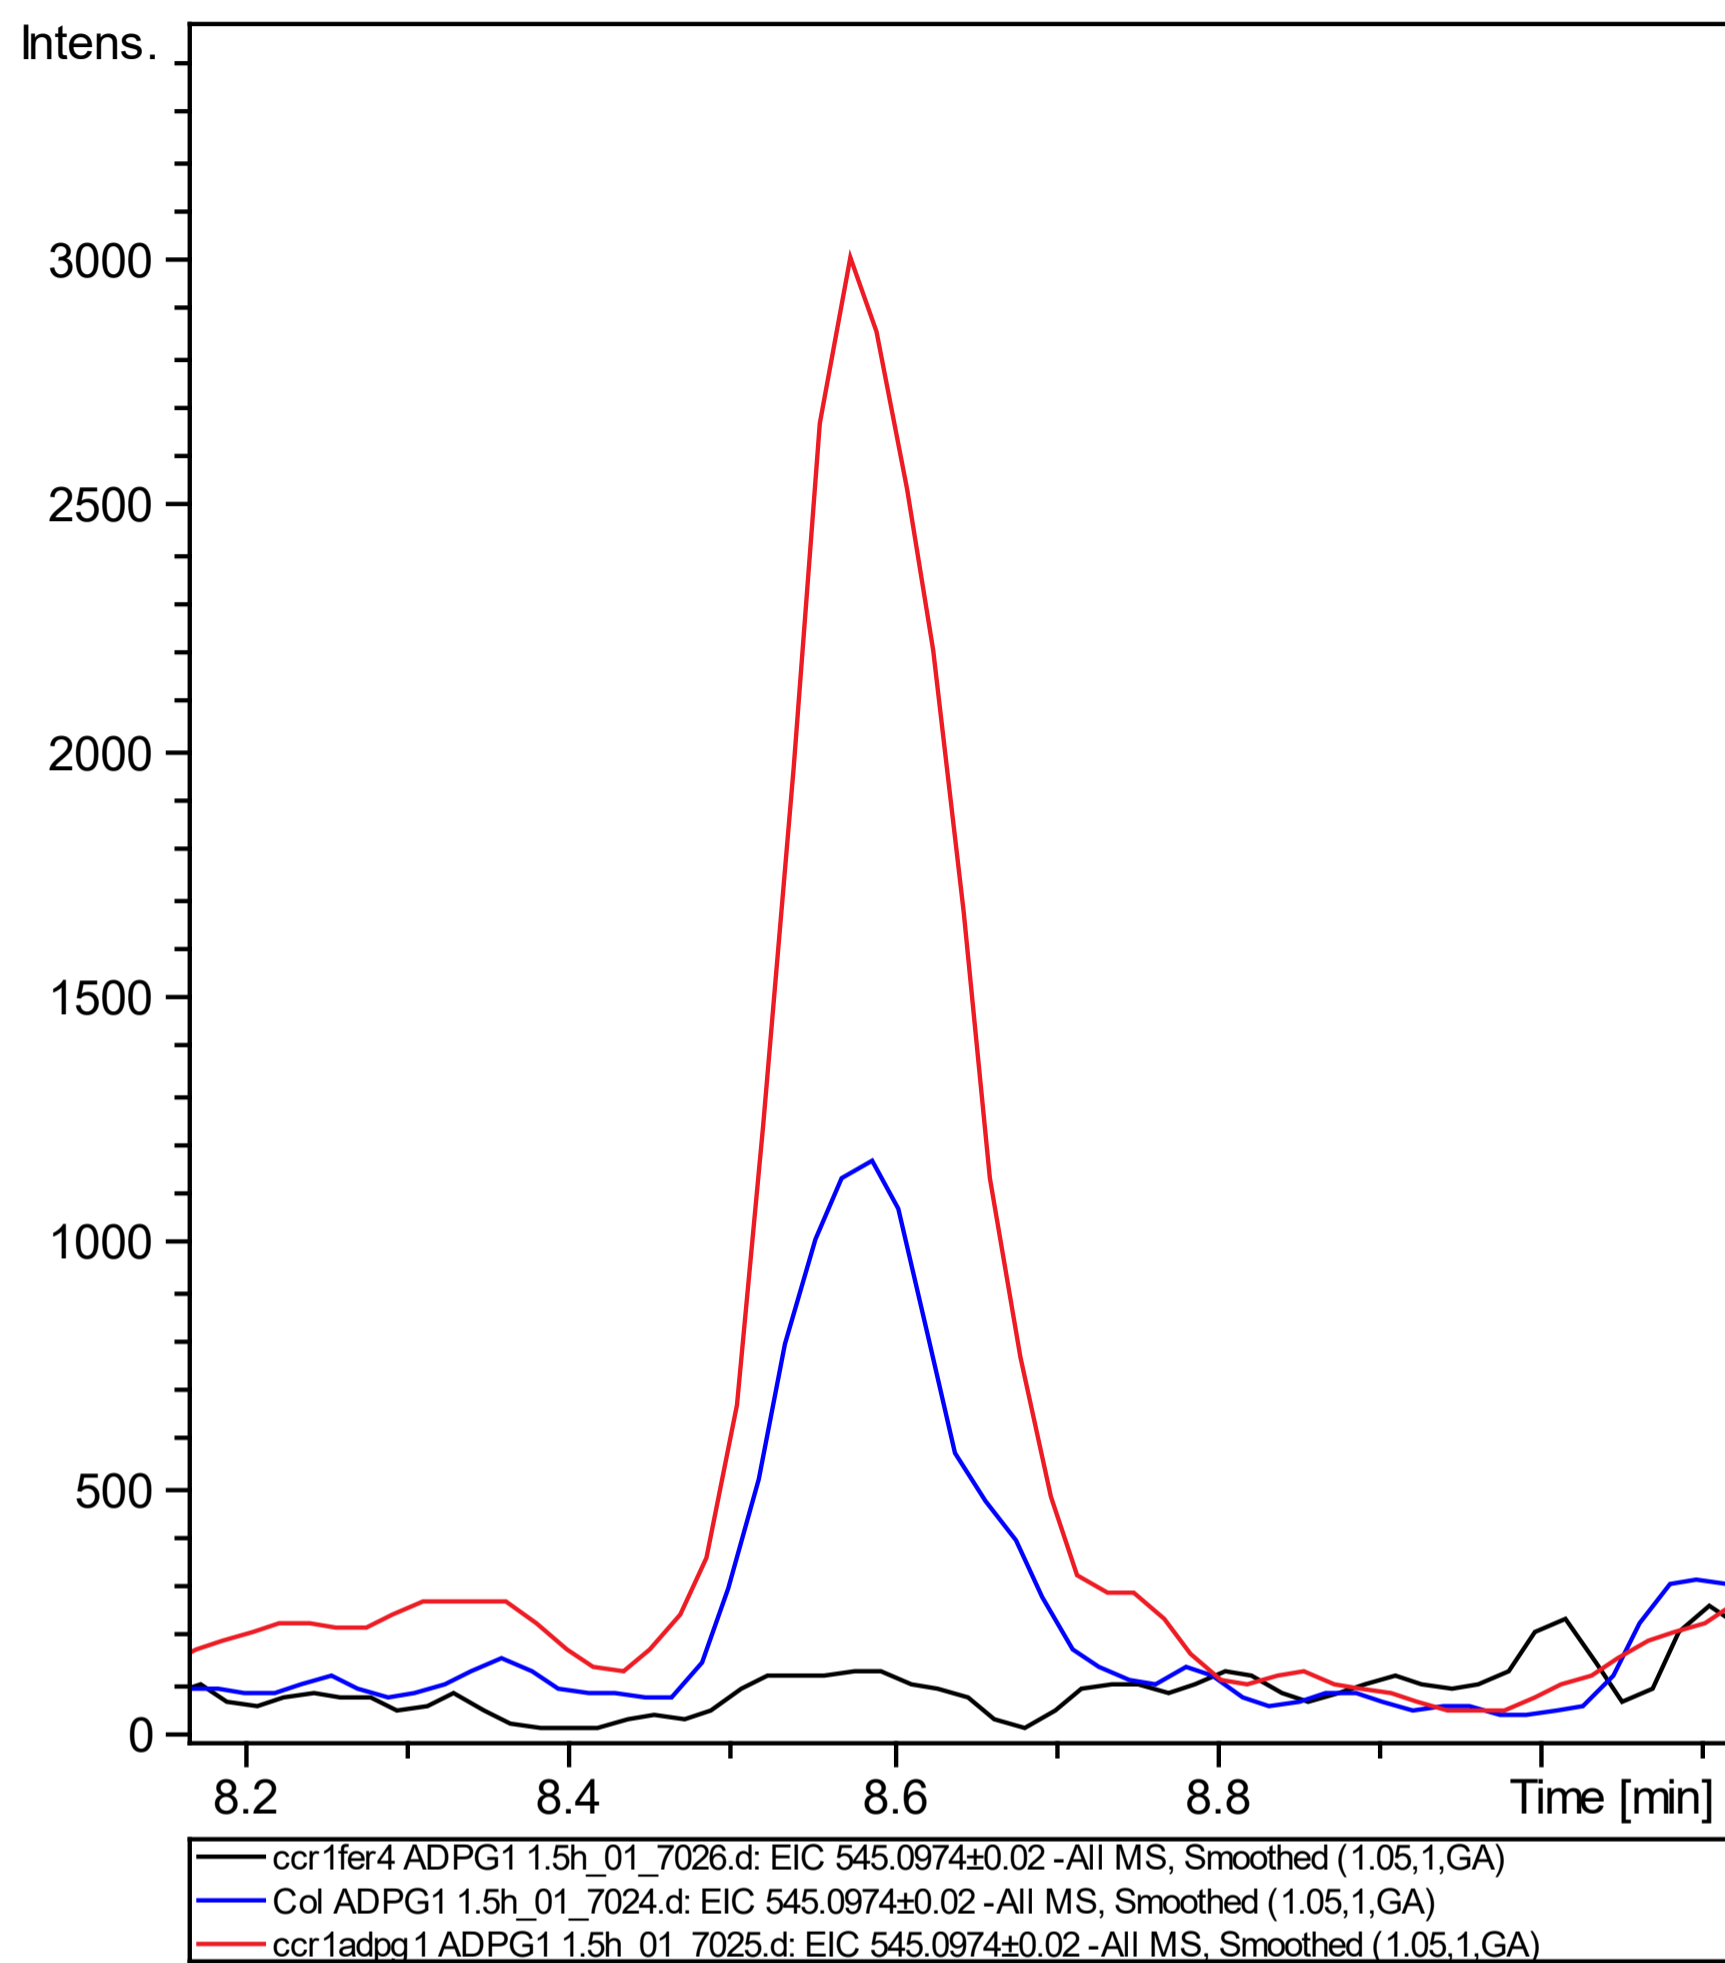

**Supplementary Fig. 9.**

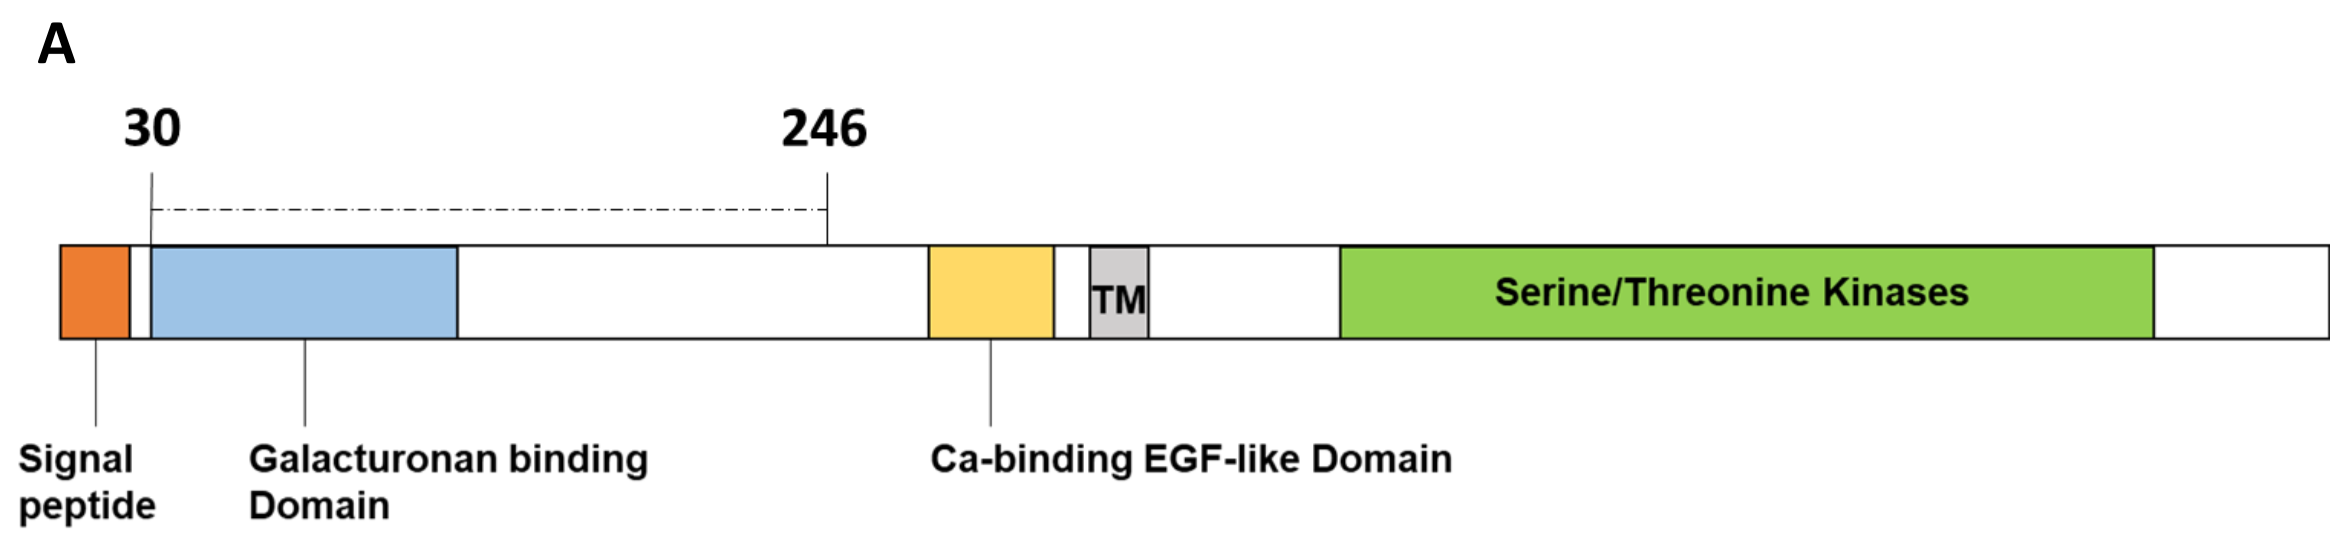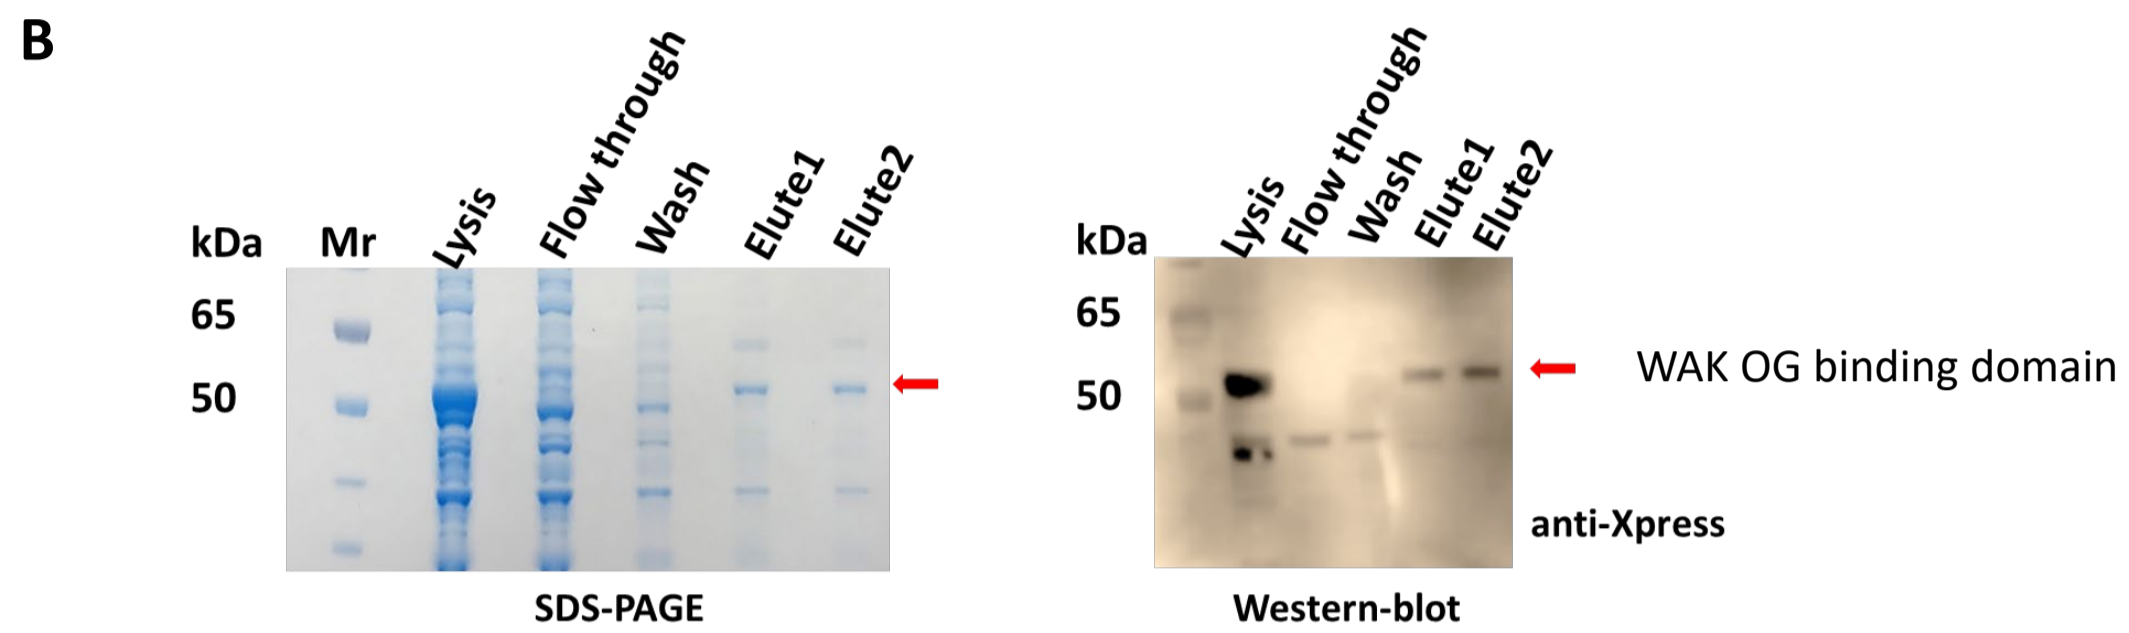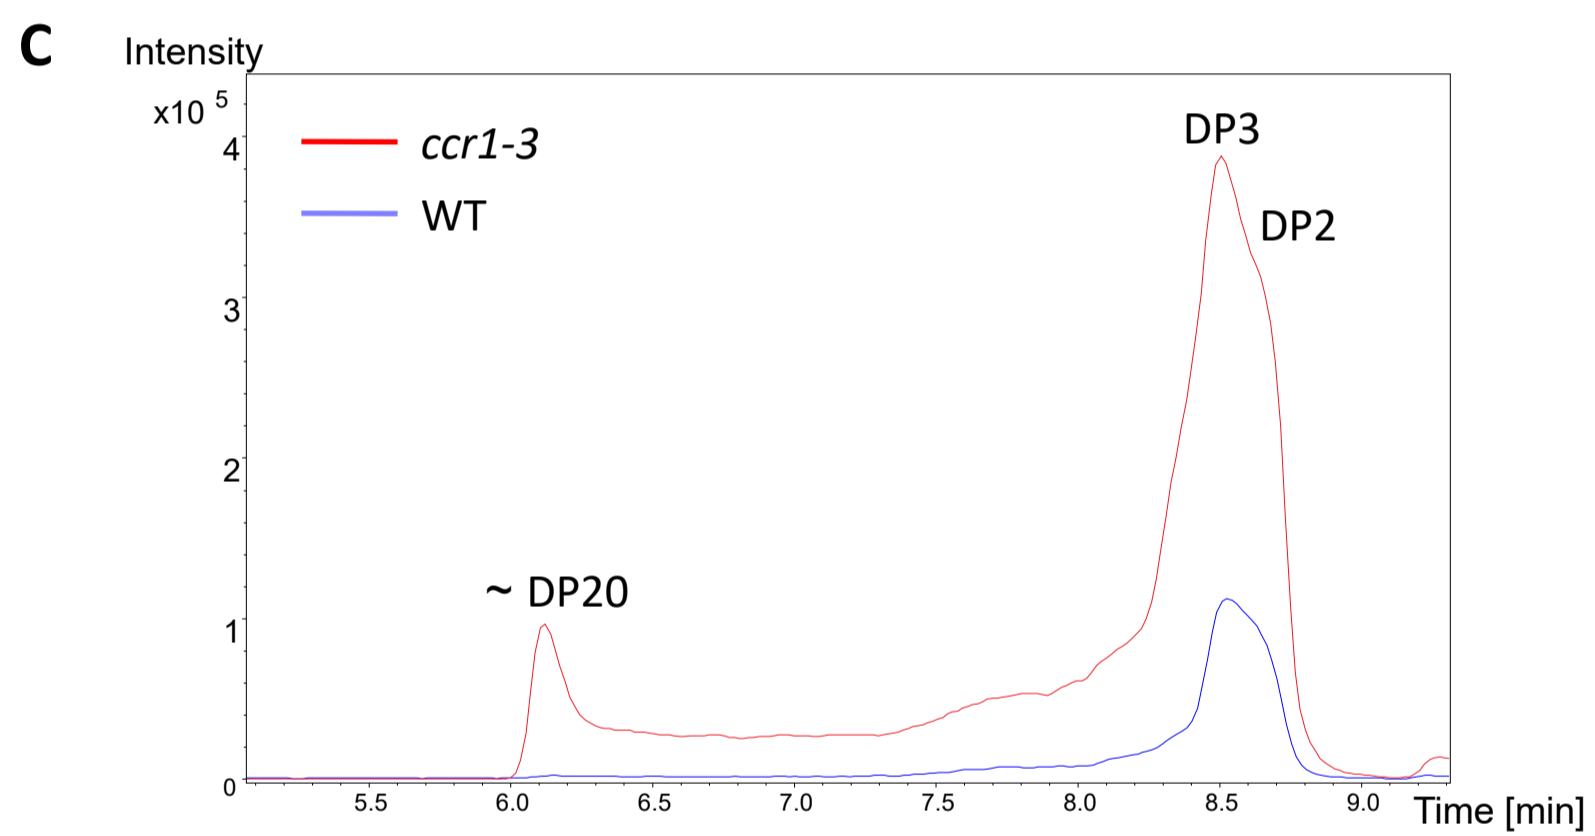

**Supplementary Fig. 10.**

## Supplementary Table1. Mutants used in this study

| Gene      | Name                                                        | Stock number | Mutant allele   | Reference                      |
|-----------|-------------------------------------------------------------|--------------|-----------------|--------------------------------|
| AT1G15950 | <i>CINNAMOYL COA REDUCTASE 1 (CCR1)</i>                     | SALK_123689  | <i>ccr1-3</i>   | 30                             |
| AT5G54380 | <i>THESEUS1 (THE1)</i>                                      | CS829966     | <i>the1-4</i>   | 23                             |
| AT3G51550 | <i>FERONIA (FER)</i>                                        | CS69044      | <i>fer-4</i>    | 28                             |
| AT3G04690 | <i>ANXUR1 (ANX1)</i>                                        | SALK_016179  | <i>anx1-1</i>   | 26                             |
| AT5G28680 | <i>ANXUR2 (ANX2)</i>                                        | SALK_133057  | <i>anx2-2</i>   | 26                             |
| AT3G46290 | <i>HERCULES RECEPTOR KINASE 1 (HERK1)</i>                   | SALK_008043  | <i>herk1-1</i>  | 23                             |
| AT1G30570 | <i>HERCULES RECEPTOR KINASE 2 (HERK2)</i>                   | SALK_105055  | <i>herk2</i>    | 22                             |
| AT4G39110 | <i>BUDDHAS PAPER SEAL 1 (BUPS1)</i>                         | SALK_061000  | <i>bups1</i>    | Name used in the current paper |
| AT2G21480 | <i>BUDDHAS PAPER SEAL 2 (BUPS2)</i>                         | CS837126     | <i>bups2</i>    | Name used in the current paper |
| AT5G61350 | <i>ERULUS (ERU)</i>                                         | SALK_083442C | <i>cap1/eru</i> | 29                             |
| AT1G31420 | <i>FEI1</i>                                                 | SALK_080073  | <i>fei1</i>     | 24                             |
| AT2G35620 | <i>FEI2</i>                                                 | SALK_044226  | <i>fei2-2</i>   | 24                             |
| AT1G21250 | <i>WALL-ASSOCIATED KINASE 1 (WAK1)</i>                      | SALK_107175  | <i>wak1</i>     | Name used in the current paper |
| AT1G21270 | <i>WALL-ASSOCIATED KINASE 2 (WAK2)</i>                      | CS813270     | <i>wak2-1</i>   | 21                             |
| AT1G21240 | <i>WALL-ASSOCIATED KINASE 3 (WAK3)</i>                      | SALK_080632C | <i>wak3</i>     | Name used in the current paper |
| AT1G21210 | <i>WALL-ASSOCIATED KINASE 4 (WAK4)</i>                      | CS842650     | <i>wak4</i>     | Name used in the current paper |
| AT2G18470 | <i>PROLINE-RICH EXTENSIN-LIKE RECEPTOR KINASE 4 (PERK4)</i> | SALK_026953  | <i>perk4-2</i>  | 25                             |

**Supplementary Table 2. Oligonucleotide primers used in this study.**

| Oligos used for genotyping       |                                                                              |                 |
|----------------------------------|------------------------------------------------------------------------------|-----------------|
| Primer name                      | Sequence (5'-3')                                                             | Mutant allele   |
| SALK_123689 LP                   | GTGTCGTAGAGGCTTTGCTTG                                                        | <i>ccr1-3</i>   |
| SALK_123689 RP                   | TTGTGGAAATATTTCCGGTTG                                                        |                 |
| CS829966 LP                      | CCGGGTCTAGATAACCAAAGC                                                        | <i>the1-4</i>   |
| CS829966 RP                      | TGTTTTAACCGTTAGCGTTGG                                                        |                 |
| CS69044 T-DNA F                  | ACGGTCTCAACGCTACCAAC                                                         | <i>fer-4</i>    |
| CS69044 T-DNA R                  | TTCCCGCCTTCGGTTTA                                                            |                 |
| CS69044 WT F                     | GATTACTCTCCAACAGAGAAAATCCT                                                   |                 |
| CS69044 WT R                     | CGTATTGCTTTTCGATTTCTA                                                        |                 |
| SALK_016179 LP                   | TCCTTTGACGACGGTTGTTAC                                                        | <i>aux1-1</i>   |
| SALK_016179 RP                   | CGCAGGCAGATACTACTCCTG                                                        |                 |
| SALK_133057 LP                   | TAAATCCACAGAACCACCACC                                                        | <i>aux2-2</i>   |
| SALK_133057 RP                   | TATCGGGTAAGAGCAACAACG                                                        |                 |
| SALK_008043 LP                   | ATGTGACTTGGGAGTTCGATG                                                        | <i>herk1-1</i>  |
| SALK_008043 RP                   | TGCAGATTCACGTCTCTGTG                                                         |                 |
| SALK_105055 LP                   | ACTGGTCACAATGCTACTGCC                                                        | <i>herk2</i>    |
| SALK_105055 RP                   | CTTACCAAACCTCCAACCTCC                                                        |                 |
| SALK_061000 LP                   | GATCAGCCTGGAAGAAGATCC                                                        | <i>bups1</i>    |
| SALK_061000 RP                   | ATCACCACGAAACAAACGAG                                                         |                 |
| CS837126 LP                      | GCCCTAAGGTTCAAGCCTATG                                                        | <i>bups2</i>    |
| CS837126 RP                      | ACCGATGATCTCTGATGCATC                                                        |                 |
| SALK_083442C LP                  | TTTATCAACGCCGTTGAAATC                                                        | <i>cap1/eru</i> |
| SALK_083442C RP                  | ATTTTGTGTCGCGGTCTGTAG                                                        |                 |
| SALK_080073 LP                   | CTTTTTCAATTCAGGTGCGTC                                                        | <i>fei1</i>     |
| SALK_080073 RP                   | TTCAAGTAACTGGACAACCCG                                                        |                 |
| SALK_044226 LP                   | TTGCCATCTATGGGAACTTTG                                                        | <i>fei2-2</i>   |
| SALK_044226 RP                   | ATTACAACCATTTGTCAGGC                                                         |                 |
| SALK_107175 LP                   | GCTTCTGGTCATTCTGCTTG                                                         | <i>wak1</i>     |
| SALK_107175 RP                   | TTGTGCTGACAAGATGTGACC                                                        |                 |
| SAIL_286_E03 LP                  | CATGTGCTGTTACCACCACAC                                                        | <i>wak2-1</i>   |
| SAIL_286_E03 RP                  | ATTCCTTGCAAGTTGCAACTG                                                        |                 |
| SALK_080632C LP                  | ATCTCACCTGTGTCGTGGAAG                                                        | <i>wak3</i>     |
| SALK_080632C RP                  | CTCAAAGAATTGTCGTCGGAG                                                        |                 |
| CS842650 LP                      | ACTATCTCTTTGAGCGGCTCC                                                        | <i>wak4</i>     |
| CS842650 RP                      | TTAACCAATTGTTCCCTGCAG                                                        |                 |
| SALK_026953 LP                   | AAATGTTCAAAAACCTCTCCCC                                                       | <i>perk4-2</i>  |
| SALK_026953 RP                   | CTCCCTGTCCAAAAGGTTAG                                                         |                 |
| LBb1.3 for SALK lines            | ATTTTGCCGATTTCCGGAAC                                                         |                 |
| LB3 for SAIL lines               | TAGCATCTGAATTCATAACCAATCTCGATACAC                                            |                 |
| Oligos used for quantitative PCR |                                                                              |                 |
| Primer name                      | Sequence (5'-3')                                                             | Gene name       |
| AT1G15950 F                      | ACGTTATCTCTAGCCGAGAGTGC                                                      | <i>CCR1</i>     |
| AT1G15950 R                      | GGTTCTTCTCGTCTTGCACTTG                                                       |                 |
| AT3G57510 F                      | AAGGACAAATGCGAAGACCAAGAG                                                     | <i>ADPG1</i>    |
| AT3G57510 R                      | ACGTTATCGCCACATCCGTAGC                                                       |                 |
| AT5G54380 F                      | TCGGCTTTGATGGAGCCTGATG                                                       | <i>THE1</i>     |
| AT5G54380 R                      | CGCCATTGGAATCCCTGGAATG                                                       |                 |
| AT3G51550 F                      | ACCTCAAGGGCAAGATCACACC                                                       | <i>FER</i>      |
| AT3G51550 R                      | CACACITTCATCGCGGTTTCAGC                                                      |                 |
| AT3G04690 F                      | GCGTTAAACCCGAGTTTGCCTAAG                                                     | <i>AUX1</i>     |
| AT3G04690 R                      | TGCAATTCATTGCCAGTCTCC                                                        |                 |
| AT5G28680 F                      | AGCAATGGTGGTGGTTCTGTGG                                                       | <i>AUX2</i>     |
| AT5G28680 R                      | TTTCTCCGGCGCTGATGTTTAC                                                       |                 |
| AT3G46290 F                      | TGGCAGAAGAAAGGGCAACTGG                                                       | <i>HERK1</i>    |
| AT3G46290 R                      | GGTCTGATATTTCCGGAAGCG                                                        |                 |
| AT1G30570 F                      | GCTTGGCTTCGAAACAGAATGG                                                       | <i>HERK2</i>    |
| AT1G30570 R                      | TTCTTCTACCGCTTGCGTCTC                                                        |                 |
| AT4G39110 F                      | AGAGGCATTCACTCAGGGCAAAG                                                      | <i>BUPS1</i>    |
| AT4G39110 R                      | TGTCACCACATCAGGCTTAGCG                                                       |                 |
| AT2G21480 F                      | AGCCGAATGGGCTATGCTATGG                                                       | <i>BUPS2</i>    |
| AT2G21480 R                      | TCACAGCACCAACGAGATGAGG                                                       |                 |
| AT5G61350 F                      | ACCGCGGTAAGGGTAGTTTCG                                                        | <i>CAP1/ERU</i> |
| AT5G61350 R                      | TCAGTGAGTTGTTGTCTGCGGAAG                                                     |                 |
| AT1G31420 F                      | TGCACAGCATTGGAGGAAATTCAC                                                     | <i>FEI1</i>     |
| AT1G31420 R                      | TTTCAGCTGGGATTGGTCCAGTG                                                      |                 |
| AT2G35620 F                      | TGGCTCCAGAGTATATGCAAAGCG                                                     | <i>FEI2</i>     |
| AT2G35620 R                      | TGAATGAGGCATCCGTGGGAAG                                                       |                 |
| AT1G21250 F                      | ACCTTTCAGCTGGTTGCCAAGAC                                                      | <i>WAK1</i>     |
| AT1G21250 R                      | TGGTGGTATCTAAGCGGTAACCAG                                                     |                 |
| AT1G21270 F                      | AGAAGCCGATGGTGGTTCCAAG                                                       | <i>WAK2</i>     |
| AT1G21270 R                      | TGCCATCTGGTTACCGCAAAG                                                        |                 |
| AT1G21240 F                      | ACCGTTCAGAGGGTTGCAAAGAC                                                      | <i>WAK3</i>     |
| AT1G21240 R                      | ACTTACAATCGAAGCCTCCATCCC                                                     |                 |
| AT1G21210 F                      | CTTTGCCTCAGCCACGAAAGAG                                                       | <i>WAK4</i>     |
| AT1G21210 R                      | TCTCGTTCATCACTTGCCATC                                                        |                 |
| AT2G18470 F                      | ATCGCCTTAGGTGCTGCGAAAG                                                       | <i>PERK4</i>    |
| AT2G18470 R                      | TGAATGATCCGAGGATGGCAGTC                                                      |                 |
| AT3G18780 F                      | TCTCCGCTCTTTCTTTCCAAGC                                                       | <i>ACT2</i>     |
| AT3G18780 R                      | ACCATTGTCACACAGATTGGTTG                                                      |                 |
| Oligos used for sgDNA            |                                                                              |                 |
| Primer name                      | sequence                                                                     |                 |
| CRISPR-Wak1/2-F                  | gattgGCCAAGGAACAGTGACAA                                                      |                 |
| CRISPR-Wak1/2-R                  | aaacTTGTACTACTGTTCTTGGCc                                                     |                 |
| CRISPR-Wak1/2/3/4/5-F            | gattgAATTCTTCGAGCAAAATGG                                                     |                 |
| CRISPR-Wak1/2/3/4/5-R            | aaacCCATTTTGTCTCGAAGAATTc                                                    |                 |
| Oligos used for constructs       |                                                                              |                 |
| Primer name                      | sequence                                                                     |                 |
| PGEX-6p-1-WAK1OG-F               | CTGTTCCAGGGGCCCTGGGATCC ATGGATCTGTACGACGATGACGATAAG TGCCAAAATAAATGTGGCAACATC |                 |
| PGEX-6p-1-WAK1OG-R               | CCGCTCGAGTCGACCCGGGAATTC TATGCTTGTGCTTCCAACCTTGCTC                           |                 |

**Supplementary Fig. 1 Transcript expression levels of candidate receptor kinase genes in Arabidopsis stems.** Relative transcript levels of cell wall receptor kinase genes in different tissues were obtained from the Arabidopsis eFP Browser. The expression pattern of *CCR1* is included for comparison. Details of the genes are presented in Table S1.

**Supplementary Fig. 2. PR1 transcript levels in inflorescence stems of wild type (WT, Col-0), *ccr1*, and homozygous double mutants obtained by crossing *ccr1-3* with a range of cell wall receptor kinase mutants as listed in Table S1.** PR1 transcript levels were determined by qRT-PCR and are expressed relative to the level in WT. Crosses of *ccr1-3* were made with (A) *bups1* and *bups2*, (B) *anx1* and *anx2*, (C) *herk1* and *herk2*, (D) *fei1* and *fei2*, (E) *the1*, (F) *cap1* and (G) *perk4*. Bars represent the means  $\pm$  SD, n=3. Hollow Dots represent individual data points. Letters indicate statically significant differences among samples according to one-way ANOVA followed by Tukey's HSD test,  $\alpha = 0.05$ .

**Supplementary Fig. 3. Pectin enzymatic fingerprinting of CWEs.** Extracted ion chromatograms obtained by high-performance size-exclusion chromatography mass spectrometry analysis in negative ionization mode of oligogalacturonides (OGs) with degrees of polymerization (DP) 3 to 8 obtained following digestion of cell wall water extracts by commercial endopolygalacturonase (EPG) from *Aspergillus aculeatus*. In blue, methylesterified OGs; in red, non-methylesterified OGs, in dark red: acetylated OGs.

**Supplementary Fig. 4. Peak identification for LC-MS oligosaccharide profiling.** (A), Fragmentation and relationships among pentose/uronic acid containing oligosaccharides from Fig.3. Numbers indicate molecular masses, arrows indicate relationships between ions. (B,C), Mass spectra of GalA<sub>3</sub> standard (B) and GalA<sub>3</sub> identified in EPG-treated crude Col-0 cell wall water extract (C). (D) Extracted ion chromatograms (EICs) of GalA<sub>3</sub> for *ccr1-3* cell wall water extract (CWE), *ccr1-3/adpg1* CWE and GalA<sub>3</sub> standard.

**Supplementary Fig. 5. Gene ontology enrichment analyses of genes up-regulated in *ccr1-3* compared with Col-0 but down-regulated in *ccr1-3/fer-4* double mutant compared with *ccr1-3*.** The paths are in three categories: the biological process, the cellular component, and the molecular function. The analysis and visualization were done by AgriGO v2.0 with default parameters (49, 50).

**Supplementary Fig. 6. Loss of function of single WAK genes does not prevent elicitor reception.** (A) WAK transcript levels in Arabidopsis inflorescence stems as determined by qRT-PCR. (B) PR1 transcript levels in stems of *ccr1-3* and homozygous *ccr1-3/wak* double mutants (with *wak1*, *wak2* and *wak3*). (C) Induction of PR1 and PR2 transcripts following injection of water (control) or *ccr1-3* CWE into leaves of wild type, *wak1* and *wak2* mutants. Bars represent the means  $\pm$  SD, n=3 (A-C), hollow dots represent individual data points. Letters indicate statically significant differences among samples according to one-way ANOVA followed by Tukey's HSD test,  $\alpha = 0.05$ .

**Supplementary Fig. 7. The *wak1/2* double mutant still responds to *ccr1*-CWE.** (A) Generation of the *wak1/2* double mutant by CRISPR/Cas9 gene editing, showing mutations generated in the target sites of *WAK1* and *WAK2* in two independent alleles of each. (B) Induction of PR1 and PR2 transcripts following injection of water (control) or *ccr1-3*-CWE into leaves of wild type, *wak1* and *wak2* mutants. Bars represent the means  $\pm$  SD, n=3 (B). Hollow Dots represent individual data points. Letters indicate statically significant differences among samples according to one-way ANOVA followed by Tukey`s HSD test,  $\alpha = 0.05$ .

**Supplementary Fig. 8. Four-week-old Arabidopsis plants of wild type (Col-0), *ccr1-3*, *wak* quintuple mutant, and *ccr1-3/waks* sextuple mutant.**

Bar = 10 cm.

**Supplementary Fig. 9. Selected ion monitoring for GalA<sub>3</sub> (at m/z = 545) of LC-MS traces of oligosaccharides from CWEs from Col-0 (blue), *ccr1-3/fer-4* (black) and *ccr1-3/adpg1* (red).** CWEs were pre-incubated with recombinant ADPG1.

**Supplementary Fig. 10. Expression of the WAK1 OG-binding domain recombinant protein for elicitor pull-down assay.** (A) Diagram of the open reading frame of the WAK1 receptor kinase, showing the oligogalacturonan binding domain (blue). (B) SDS PAGE analysis of the purification of recombinant OG-binding domain GST-fusion from *E. coli* lysates (left) and confirmation of expression by protein gel-blot analysis (right). (C) Oligogalacturonides with degree of polymerization (DP) 2 to DP20, released from bound material (from *ccr1-3* (red) or wild-type (blue) cell wall extracts in pull down assays with immobilized OG-binding domain fusion protein, with the buffer alone spectrum as the baseline. Bound oligosaccharides were digested with endo-polygalacturonase M (EPG) prior to separation and analysis of fragments by LC-MS.

**Supplementary Table1. Mutants used in this study**

**Supplementary Table 2. Oligonucleotide primers used in this study.**

**Supplementary Dataset 1. List of genes that are highly expressed in *ccr1-3* compared with Col-0 but decreased in *ccr1-3/fer-4* compared with *ccr1-3*.** P-value<0.05 and fold change >2 in Col-0 and *ccr1-3*.
